# Supplementary material for: Complexes of lanthanides(iii) with mixed 2,2′-bipyridyl and 5,7-dibromo-8-quinolinoline chelating ligands as a new class of promising anti-cancer agents
Source: Royal Society of Chemistry journal article supplement (doi:10.1039/c9mt00037b), 2019-04-24
Supplement: c9mt00037b1.pdf [file c9mt00037b1.pdf]

**Electronic Supporting Information Materials**

**Complexes of Lanthanides(III) with mixed 2,2'-bipyridyl and 5,7-dibromo-8-quinolinoline chelating ligands as a new class of promising anti-cancer agents**

Qi-Pin Qin <sup>a,d,\*</sup>, Zhen-Feng Wang <sup>a,1</sup>, Ming-Xiong Tan <sup>a,\*</sup>, Xiao-Ling Huang <sup>a</sup>, Hua-Hong Zou <sup>d,\*</sup>, Bi-Qun Zou <sup>b,\*</sup>, Bei-Bei Shi <sup>a</sup> and Shu-Hua Zhang <sup>c,\*</sup>

---

<sup>a</sup> Guangxi Key Lab of Agricultural Resources Chemistry and Biotechnology, College of Chemistry and Food Science, Yulin Normal University, 1303 Jiaoyudong Road, Yulin 537000, PR China. qpqin2018@126.com (Q.-P. Qin); mxtan2018@126.com (M.-X. Tan). Tel./Fax.: +86-775-2623650.

<sup>b</sup> Department of Chemistry, Guilin Normal College, 21 Xinyi Road, Guilin 541001, PR China. zoubiqun@163.com (B.-Q. Zou).

<sup>c</sup> Guangxi Key Laboratory of Electrochemical and Magnetochemical Functional Materials, College of Chemistry and Bioengineering, Guilin University of Technology, Guilin 541004, China. zsh720108@163.com (S.-H. Zhang).

<sup>d</sup> State Key Laboratory for the Chemistry and Molecular Engineering of Medicinal Resources, School of Chemistry and Pharmacy, Guangxi Normal University, 15 Yucai Road, Guilin 541004, PR China. gxnuchem@foxmail.com (H.-H. Zou).

<sup>1</sup> These authors contributed equally to this work.

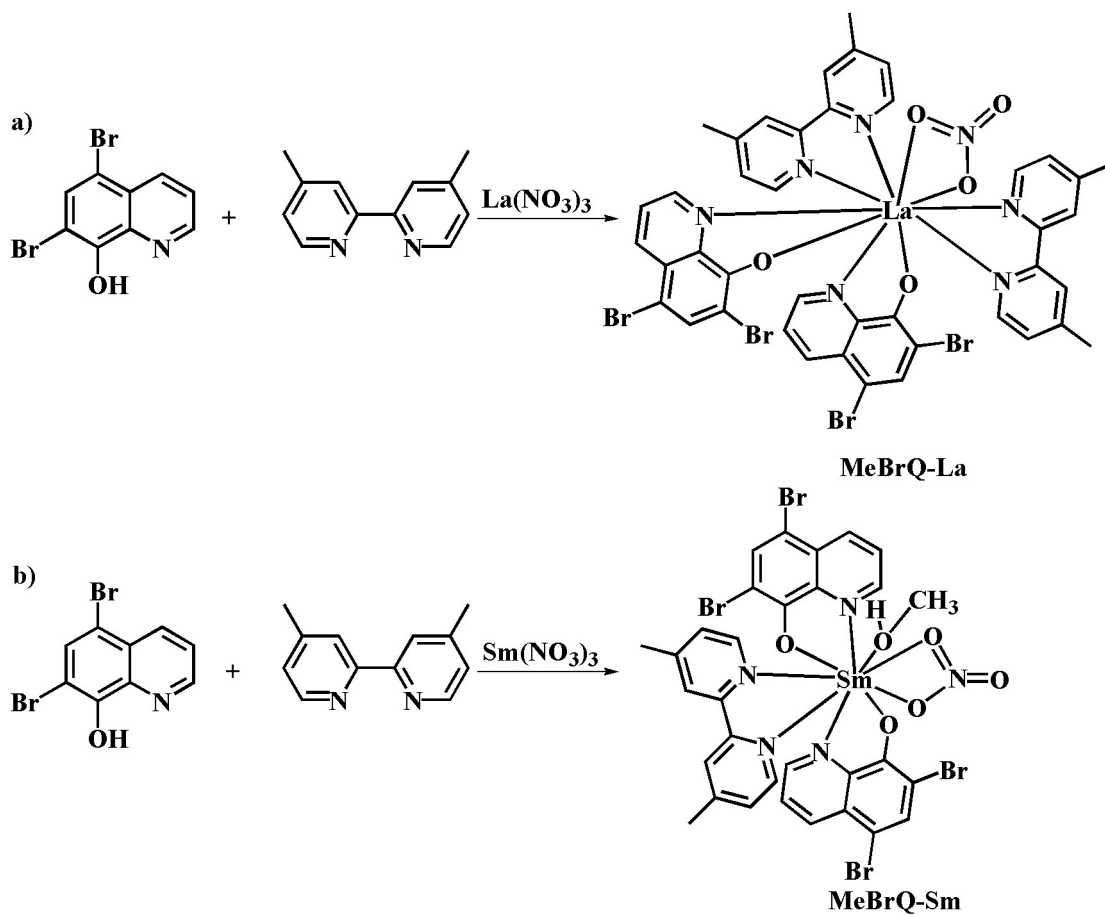

**Scheme S1.** Synthetic route for **MeBrQ-La** (a) and **MeBrQ-Sm** (b) complexes.

Reagents are the following:  $\text{La}(\text{NO}_3)_3 \cdot 6\text{H}_2\text{O}$  or  $\text{Sm}(\text{NO}_3)_3 \cdot 6\text{H}_2\text{O}$ ,  $\text{CH}_3\text{OH}/\text{CH}_2\text{Cl}_2$  (10:1),  $65^\circ\text{C}$ , 12 h.

**Table S1.** Crystal data and structure refinement details for **MeBrQ-La**.

|                                             |                                                                                 |
|---------------------------------------------|---------------------------------------------------------------------------------|
| Empirical formula                           | C <sub>42</sub> H <sub>32</sub> Br <sub>4</sub> LaN <sub>7</sub> O <sub>5</sub> |
| Formula weight                              | 1173.29                                                                         |
| Temperature/K                               | 293(2)                                                                          |
| Crystal system                              | monoclinic                                                                      |
| Space group                                 | C2/c                                                                            |
| a/Å                                         | 26.0817(16)                                                                     |
| b/Å                                         | 20.6620(12)                                                                     |
| c/Å                                         | 19.7728(11)                                                                     |
| α/°                                         | 90                                                                              |
| β/°                                         | 125.502(2)                                                                      |
| γ/°                                         | 90                                                                              |
| Volume/Å <sup>3</sup>                       | 8674.6(9)                                                                       |
| Z                                           | 8                                                                               |
| ρ <sub>calc</sub> /mg/mm <sup>3</sup>       | 1.797                                                                           |
| m/mm <sup>-1</sup>                          | 4.722                                                                           |
| F(000)                                      | 4560.0                                                                          |
| Crystal size/mm <sup>3</sup>                | 0.346 × 0.297 × 0.149                                                           |
| 2Θ range for data collection                | 5.774 to 55.112°                                                                |
| Index ranges                                | -33 ≤ h ≤ 33, -26 ≤ k ≤ 26, -25 ≤ l ≤ 25                                        |
| Reflections collected                       | 68847                                                                           |
| Independent reflections                     | 10005[R(int) = 0.0505]                                                          |
| Data/restraints/parameters                  | 10005/0/536                                                                     |
| Goodness-of-fit on F <sup>2</sup>           | 1.023                                                                           |
| Final R indexes [I ≥ 2σ (I)]                | R <sub>1</sub> = 0.0405, wR <sub>2</sub> = 0.0784                               |
| Final R indexes [all data]                  | R <sub>1</sub> = 0.0703, wR <sub>2</sub> = 0.0889                               |
| Largest diff. peak/hole / e Å <sup>-3</sup> | 1.81/-1.68                                                                      |

$$^a R_1 = \frac{\sum ||F_o| - |F_c||}{\sum |F_o|}; \quad ^b wR_2 = \left[ \frac{\sum w(F_o^2 - F_c^2)^2}{\sum w(F_o^2)^2} \right]^{1/2}.$$

**Table S2.** Selected bond lengths (Å) for **MeBrQ-La**.

| Atom | Atom | Length/Å | Atom | Atom | Length/Å |
|------|------|----------|------|------|----------|
| La1  | O1   | 2.642(4) | C5   | C6   | 1.397(7) |
| La1  | O2   | 2.747(3) | C5   | C9   | 1.421(6) |
| La1  | O4   | 2.401(2) | C6   | C7   | 1.359(7) |
| La1  | O5   | 2.400(3) | C7   | C8   | 1.388(7) |
| La1  | N1   | 2.781(3) | C10  | C11  | 1.377(6) |
| La1  | N2   | 2.779(3) | C11  | C12  | 1.365(7) |
| La1  | N3   | 2.790(3) | C12  | C13  | 1.514(7) |
| La1  | N4   | 2.744(3) | C12  | C14  | 1.377(7) |
| La1  | N6   | 2.808(3) | C14  | C15  | 1.383(6) |
| La1  | N7   | 2.779(3) | C15  | C16  | 1.486(6) |
| Br1  | C25  | 1.901(4) | C16  | C17  | 1.384(6) |

|     |     |          |     |     |          |
|-----|-----|----------|-----|-----|----------|
| Br2 | C23 | 1.898(4) | C17 | C18 | 1.381(6) |
| Br3 | C4  | 1.891(5) | C18 | C19 | 1.513(7) |
| Br4 | C2  | 1.883(4) | C18 | C20 | 1.362(7) |
| O1  | N5  | 1.262(6) | C20 | C21 | 1.371(7) |
| O2  | N5  | 1.256(5) | C22 | C23 | 1.388(5) |
| O3  | N5  | 1.221(5) | C22 | C30 | 1.433(5) |
| O4  | C22 | 1.293(5) | C23 | C24 | 1.402(6) |
| O5  | C1  | 1.295(5) | C24 | C25 | 1.356(6) |
| N1  | C10 | 1.323(5) | C25 | C26 | 1.412(6) |
| N1  | C15 | 1.337(5) | C26 | C27 | 1.408(6) |
| N2  | C16 | 1.341(5) | C26 | C30 | 1.422(5) |
| N2  | C21 | 1.345(5) | C27 | C28 | 1.351(6) |
| N3  | C8  | 1.330(5) | C28 | C29 | 1.400(6) |
| N3  | C9  | 1.361(5) | C31 | C32 | 1.376(6) |
| N4  | C29 | 1.318(5) | C32 | C33 | 1.383(6) |
| N4  | C30 | 1.361(5) | C33 | C34 | 1.513(7) |
| N6  | C37 | 1.342(5) | C33 | C35 | 1.380(7) |
| N6  | C42 | 1.336(6) | C35 | C36 | 1.380(6) |
| N7  | C31 | 1.331(5) | C36 | C37 | 1.480(6) |
| N7  | C36 | 1.351(5) | C37 | C38 | 1.393(6) |
| C1  | C2  | 1.398(6) | C38 | C39 | 1.376(7) |
| C1  | C9  | 1.444(6) | C39 | C40 | 1.515(7) |
| C2  | C3  | 1.387(7) | C39 | C41 | 1.364(7) |
| C3  | C4  | 1.362(7) | C41 | C42 | 1.383(6) |
| C4  | C5  | 1.409(6) |     |     |          |

**Table S3.** Selected bond angles (°) for **MeBrQ-La**.

| Atom | Atom | Atom | Angle/°    | Atom | Atom | Atom | Angle/°  |
|------|------|------|------------|------|------|------|----------|
| O1   | La1  | O2   | 46.75(12)  | C2   | C1   | C9   | 114.9(4) |
| O1   | La1  | N1   | 90.79(12)  | C1   | C2   | Br4  | 118.1(4) |
| O1   | La1  | N2   | 72.32(12)  | C3   | C2   | Br4  | 118.4(3) |
| O1   | La1  | N3   | 147.05(11) | C3   | C2   | C1   | 123.3(4) |
| O1   | La1  | N4   | 137.09(12) | C4   | C3   | C2   | 120.6(4) |
| O1   | La1  | N6   | 65.17(13)  | C3   | C4   | Br3  | 118.2(4) |
| O1   | La1  | N7   | 77.99(11)  | C3   | C4   | C5   | 121.0(5) |
| O2   | La1  | N1   | 64.35(10)  | C5   | C4   | Br3  | 120.6(4) |
| O2   | La1  | N2   | 90.62(11)  | C4   | C5   | C9   | 117.8(4) |
| O2   | La1  | N3   | 136.24(10) | C6   | C5   | C4   | 125.3(5) |
| O2   | La1  | N6   | 98.48(11)  | C6   | C5   | C9   | 116.8(4) |
| O2   | La1  | N7   | 67.98(10)  | C7   | C6   | C5   | 120.1(5) |
| O4   | La1  | O1   | 131.32(11) | C6   | C7   | C8   | 119.5(5) |
| O4   | La1  | O2   | 85.16(11)  | N3   | C8   | C7   | 123.4(4) |

---

|     |     |     |            |     |     |     |          |
|-----|-----|-----|------------|-----|-----|-----|----------|
| O4  | La1 | N1  | 70.04(9)   | N3  | C9  | C1  | 115.0(4) |
| O4  | La1 | N2  | 123.59(10) | N3  | C9  | C5  | 122.7(4) |
| O4  | La1 | N3  | 70.62(9)   | C5  | C9  | C1  | 122.2(4) |
| O4  | La1 | N4  | 62.29(9)   | N1  | C10 | C11 | 123.6(4) |
| O4  | La1 | N6  | 128.20(10) | C12 | C11 | C10 | 119.5(4) |
| O4  | La1 | N7  | 76.60(9)   | C11 | C12 | C13 | 121.5(5) |
| O5  | La1 | O1  | 104.45(12) | C11 | C12 | C14 | 117.2(4) |
| O5  | La1 | O2  | 150.25(11) | C14 | C12 | C13 | 121.3(5) |
| O5  | La1 | O4  | 124.18(9)  | C12 | C14 | C15 | 120.5(4) |
| O5  | La1 | N1  | 117.50(9)  | N1  | C15 | C14 | 121.5(4) |
| O5  | La1 | N2  | 69.86(10)  | N1  | C15 | C16 | 116.7(3) |
| O5  | La1 | N3  | 61.52(9)   | C14 | C15 | C16 | 121.8(4) |
| O5  | La1 | N4  | 76.42(9)   | N2  | C16 | C15 | 116.7(3) |
| O5  | La1 | N6  | 68.46(10)  | N2  | C16 | C17 | 121.7(4) |
| O5  | La1 | N7  | 119.51(9)  | C17 | C16 | C15 | 121.7(4) |
| N1  | La1 | N3  | 73.15(10)  | C18 | C17 | C16 | 120.6(4) |
| N1  | La1 | N6  | 155.68(11) | C17 | C18 | C19 | 120.2(5) |
| N2  | La1 | N1  | 57.91(10)  | C20 | C18 | C17 | 117.6(4) |
| N2  | La1 | N3  | 74.79(10)  | C20 | C18 | C19 | 122.1(5) |
| N2  | La1 | N6  | 108.08(10) | C18 | C20 | C21 | 119.4(4) |
| N2  | La1 | N7  | 150.30(10) | N2  | C21 | C20 | 124.0(4) |
| N3  | La1 | N6  | 125.20(10) | O4  | C22 | C23 | 124.4(4) |
| N4  | La1 | O2  | 127.97(11) | O4  | C22 | C30 | 119.9(3) |
| N4  | La1 | N1  | 127.66(10) | C23 | C22 | C30 | 115.7(4) |
| N4  | La1 | N2  | 140.79(10) | C22 | C23 | Br2 | 118.9(3) |
| N4  | La1 | N3  | 71.86(10)  | C22 | C23 | C24 | 122.9(4) |
| N4  | La1 | N6  | 76.21(10)  | C24 | C23 | Br2 | 118.1(3) |
| N4  | La1 | N7  | 65.75(9)   | C25 | C24 | C23 | 119.8(4) |
| N7  | La1 | N1  | 122.93(10) | C24 | C25 | Br1 | 118.3(3) |
| N7  | La1 | N3  | 134.91(10) | C24 | C25 | C26 | 122.1(4) |
| N7  | La1 | N6  | 58.10(10)  | C26 | C25 | Br1 | 119.6(3) |
| N5  | O1  | La1 | 100.8(3)   | C25 | C26 | C30 | 116.7(4) |
| N5  | O2  | La1 | 95.8(3)    | C27 | C26 | C25 | 126.2(4) |
| C22 | O4  | La1 | 126.1(2)   | C27 | C26 | C30 | 117.1(4) |
| C1  | O5  | La1 | 128.5(2)   | C28 | C27 | C26 | 120.0(4) |
| C10 | N1  | La1 | 118.5(3)   | C27 | C28 | C29 | 119.4(4) |
| C10 | N1  | C15 | 117.6(3)   | N4  | C29 | C28 | 122.8(4) |
| C15 | N1  | La1 | 123.1(2)   | N4  | C30 | C22 | 115.8(3) |
| C16 | N2  | La1 | 123.6(3)   | N4  | C30 | C26 | 121.5(4) |
| C16 | N2  | C21 | 116.8(4)   | C26 | C30 | C22 | 122.6(3) |
| C21 | N2  | La1 | 119.3(3)   | N7  | C31 | C32 | 124.3(4) |
| C8  | N3  | La1 | 128.1(3)   | C31 | C32 | C33 | 119.5(4) |
| C8  | N3  | C9  | 117.4(4)   | C32 | C33 | C34 | 121.8(5) |
| C9  | N3  | La1 | 114.5(3)   | C35 | C33 | C32 | 116.0(4) |
| C29 | N4  | La1 | 127.1(3)   | C35 | C33 | C34 | 122.2(5) |

---

|     |    |     |          |     |     |     |          |
|-----|----|-----|----------|-----|-----|-----|----------|
| C29 | N4 | C30 | 119.0(3) | C36 | C35 | C33 | 122.0(4) |
| C30 | N4 | La1 | 113.8(2) | N7  | C36 | C35 | 121.1(4) |
| O2  | N5 | O1  | 116.4(4) | N7  | C36 | C37 | 116.5(4) |
| O3  | N5 | O1  | 121.8(5) | C35 | C36 | C37 | 122.4(4) |
| O3  | N5 | O2  | 121.7(5) | N6  | C37 | C36 | 117.2(3) |
| C37 | N6 | La1 | 122.4(3) | N6  | C37 | C38 | 121.2(4) |
| C42 | N6 | La1 | 118.3(3) | C38 | C37 | C36 | 121.7(4) |
| C42 | N6 | C37 | 117.5(4) | C39 | C38 | C37 | 120.9(5) |
| C31 | N7 | La1 | 118.8(3) | C38 | C39 | C40 | 120.5(5) |
| C31 | N7 | C36 | 116.9(3) | C41 | C39 | C38 | 117.4(4) |
| C36 | N7 | La1 | 124.0(3) | C41 | C39 | C40 | 122.1(5) |
| O5  | C1 | C2  | 124.9(4) | C39 | C41 | C42 | 119.6(5) |
| O5  | C1 | C9  | 120.1(3) | N6  | C42 | C41 | 123.4(5) |

**Table S4.** Crystal data and structure refinement details for **MeBrQ-Sm**.

|                                                |                                                                |
|------------------------------------------------|----------------------------------------------------------------|
| Empirical formula                              | $C_{124}H_{96}Br_{16}N_{20}O_{24}Sm_4$                         |
| Formula weight                                 | 4130.16                                                        |
| Temperature/K                                  | 293(2)                                                         |
| Crystal system                                 | triclinic                                                      |
| Space group                                    | P-1                                                            |
| a/Å                                            | 9.7421(4)                                                      |
| b/Å                                            | 16.9016(6)                                                     |
| c/Å                                            | 25.0742(9)                                                     |
| $\alpha/^\circ$                                | 72.9580(10)                                                    |
| $\beta/^\circ$                                 | 85.7190(10)                                                    |
| $\gamma/^\circ$                                | 74.7950(10)                                                    |
| Volume/Å <sup>3</sup>                          | 3809.2(2)                                                      |
| Z                                              | 1                                                              |
| $\rho_{\text{calc}}/\text{g/cm}^3$             | 1.800                                                          |
| $\mu/\text{mm}^{-1}$                           | 5.782                                                          |
| F(000)                                         | 1980.0                                                         |
| Crystal size/mm <sup>3</sup>                   | 0.24 × 0.21 × 0.12                                             |
| Radiation                                      | MoK $\alpha$ ( $\lambda = 0.71073$ )                           |
| 2 $\theta$ range for data collection/ $^\circ$ | 5.878 to 55.068                                                |
| Index ranges                                   | -12 ≤ h ≤ 12, -21 ≤ k ≤ 21, -32 ≤ l ≤ 32                       |
| Reflections collected                          | 81304                                                          |
| Independent reflections                        | 17513 [R <sub>int</sub> = 0.0704, R <sub>sigma</sub> = 0.0749] |
| Data/restraints/parameters                     | 17513/6/859                                                    |
| Goodness-of-fit on F <sup>2</sup>              | 1.022                                                          |
| Final R indexes [I ≥ 2 $\sigma$ (I)]           | R <sub>1</sub> = 0.0479, wR <sub>2</sub> = 0.0897              |

---

Final R indexes [all data]  $R_1 = 0.1039$ ,  $wR_2 = 0.1048$   
Largest diff. peak/hole /  $e \text{ \AA}^{-3}$  1.18/-0.85

---

**Table S5.** Selected bond lengths ( $\text{\AA}$ ) for **MeBrQ-Sm**.

| <b>Atom</b> | <b>Atom</b> | <b>Length/<math>\text{\AA}</math></b> | <b>Atom</b> | <b>Atom</b> | <b>Length/<math>\text{\AA}</math></b> |
|-------------|-------------|---------------------------------------|-------------|-------------|---------------------------------------|
| Sm1         | O2          | 2.296(3)                              | C45         | C49         | 1.428(9)                              |
| Sm1         | O1          | 2.285(3)                              | N1          | C6          | 1.364(7)                              |
| Sm1         | O3          | 2.547(4)                              | N1          | C7          | 1.319(7)                              |
| Sm1         | N3          | 2.653(4)                              | N7          | C46         | 1.359(7)                              |
| Sm1         | N2          | 2.658(4)                              | N7          | C47         | 1.329(7)                              |
| Sm1         | O4          | 2.623(4)                              | C44         | C43         | 1.352(9)                              |
| Sm1         | O6          | 2.495(4)                              | C44         | Br8         | 1.898(6)                              |
| Sm1         | N4          | 2.598(4)                              | N10         | O11         | 1.213(6)                              |
| Sm1         | N1          | 2.586(4)                              | C23         | C22         | 1.381(7)                              |
| Sm2         | O7          | 2.291(3)                              | C8          | C7          | 1.405(8)                              |
| Sm2         | O8          | 2.298(3)                              | C8          | C9          | 1.353(9)                              |
| Sm2         | O10         | 2.571(3)                              | C39         | C38         | 1.401(8)                              |
| Sm2         | N6          | 2.644(4)                              | C39         | C40         | 1.345(8)                              |
| Sm2         | N9          | 2.591(4)                              | C55         | C54         | 1.490(7)                              |
| Sm2         | O9          | 2.528(4)                              | C55         | C56         | 1.382(7)                              |
| Sm2         | O12         | 2.515(4)                              | C21         | C22         | 1.377(7)                              |
| Sm2         | N8          | 2.661(4)                              | C21         | C30         | 1.520(7)                              |
| Sm2         | N7          | 2.583(5)                              | C21         | C20         | 1.375(8)                              |
| Sm2         | N10         | 2.967(5)                              | C15         | C10         | 1.429(8)                              |
| Br5         | C33         | 1.905(5)                              | C15         | C14         | 1.421(7)                              |
| Br1         | C2          | 1.888(6)                              | C6          | C5          | 1.427(7)                              |
| O2          | C10         | 1.300(6)                              | C6          | C1          | 1.432(7)                              |
| O7          | C32         | 1.306(6)                              | C5          | C4          | 1.378(8)                              |
| O1          | C1          | 1.299(6)                              | C5          | C9          | 1.402(8)                              |
| O8          | C41         | 1.283(6)                              | C37         | C36         | 1.416(7)                              |
| O3          | N5          | 1.254(6)                              | C37         | C32         | 1.440(7)                              |
| O5          | N5          | 1.223(6)                              | C46         | C41         | 1.432(7)                              |
| N3          | C19         | 1.341(7)                              | C54         | C53         | 1.385(7)                              |
| N3          | C23         | 1.346(6)                              | C58         | C57         | 1.378(8)                              |
| O10         | N10         | 1.269(6)                              | C58         | C59         | 1.371(7)                              |
| N2          | C15         | 1.360(7)                              | C25         | C26         | 1.377(8)                              |
| N2          | C16         | 1.309(7)                              | C27         | C26         | 1.365(7)                              |
| O4          | N5          | 1.264(5)                              | C27         | C28         | 1.374(7)                              |
| N6          | C37         | 1.349(6)                              | C4          | C3          | 1.369(9)                              |
| N6          | C38         | 1.325(7)                              | C4          | Br2         | 1.904(6)                              |

|     |     |          |     |     |           |
|-----|-----|----------|-----|-----|-----------|
| O6  | C31 | 1.416(7) | C36 | C40 | 1.406(8)  |
| N4  | C24 | 1.346(6) | C49 | C48 | 1.331(10) |
| N4  | C28 | 1.337(6) | C10 | C11 | 1.382(8)  |
| N9  | C55 | 1.336(6) | C18 | C14 | 1.389(9)  |
| N9  | C59 | 1.332(7) | C18 | C17 | 1.345(9)  |
| O9  | N10 | 1.254(6) | C42 | C41 | 1.383(8)  |
| C35 | C34 | 1.360(8) | C42 | C43 | 1.413(8)  |
| C35 | C36 | 1.396(8) | C42 | Br7 | 1.887(6)  |
| C35 | Br6 | 1.895(5) | C26 | C29 | 1.518(7)  |
| C33 | C34 | 1.396(7) | C16 | C17 | 1.407(8)  |
| C33 | C32 | 1.374(7) | C2  | C3  | 1.386(8)  |
| C19 | C20 | 1.370(7) | C2  | C1  | 1.391(7)  |
| O12 | C62 | 1.393(8) | C53 | C52 | 1.385(8)  |
| N8  | C54 | 1.345(6) | C47 | C48 | 1.384(9)  |
| N8  | C50 | 1.349(7) | C50 | C51 | 1.375(8)  |
| C24 | C23 | 1.480(7) | C57 | C61 | 1.526(7)  |
| C24 | C25 | 1.383(7) | C57 | C56 | 1.353(8)  |
| C13 | C14 | 1.399(9) | C51 | C52 | 1.368(9)  |
| C13 | C12 | 1.354(9) | C52 | C60 | 1.520(8)  |
| C13 | Br4 | 1.907(6) | C12 | C11 | 1.413(8)  |
| C45 | C44 | 1.403(9) | C11 | Br3 | 1.892(6)  |
| C45 | C46 | 1.428(8) |     |     |           |

**Table S6.** Selected bond angles (°) for **MeBrQ-Sm**.

| Atom Atom Atom |     |    | Angle/°    | Atom Atom Atom |     |     | Angle/°  |
|----------------|-----|----|------------|----------------|-----|-----|----------|
| O2             | Sm1 | O3 | 102.55(13) | C50            | N8  | Sm2 | 121.3(3) |
| O2             | Sm1 | N3 | 74.00(13)  | N4             | C24 | C23 | 116.8(4) |
| O2             | Sm1 | N2 | 64.28(13)  | N4             | C24 | C25 | 121.4(5) |
| O2             | Sm1 | O4 | 139.19(12) | C25            | C24 | C23 | 121.8(4) |
| O2             | Sm1 | O6 | 77.96(13)  | C14            | C13 | Br4 | 119.7(6) |
| O2             | Sm1 | N4 | 135.82(12) | C12            | C13 | C14 | 122.3(6) |
| O2             | Sm1 | N1 | 87.30(14)  | C12            | C13 | Br4 | 118.0(5) |
| O1             | Sm1 | O2 | 133.02(12) | C44            | C45 | C46 | 117.9(6) |
| O1             | Sm1 | O3 | 76.94(13)  | C44            | C45 | C49 | 127.0(6) |
| O1             | Sm1 | N3 | 129.40(12) | C49            | C45 | C46 | 115.1(6) |
| O1             | Sm1 | N2 | 73.05(13)  | C6             | N1  | Sm1 | 114.0(3) |
| O1             | Sm1 | O4 | 75.29(12)  | C7             | N1  | Sm1 | 128.0(4) |
| O1             | Sm1 | O6 | 141.82(13) | C7             | N1  | C6  | 118.0(5) |
| O1             | Sm1 | N4 | 78.48(12)  | C46            | N7  | Sm2 | 113.8(3) |



|     |     |     |            |     |     |     |          |
|-----|-----|-----|------------|-----|-----|-----|----------|
| O1  | Sm1 | N1  | 66.01(13)  | C47 | N7  | Sm2 | 126.9(4) |
| O3  | Sm1 | N3  | 147.68(13) | C47 | N7  | C46 | 119.2(5) |
| O3  | Sm1 | N2  | 67.29(13)  | C45 | C44 | Br8 | 119.1(5) |
| O3  | Sm1 | O4  | 48.99(11)  | C43 | C44 | C45 | 121.7(6) |
| O3  | Sm1 | N4  | 116.27(13) | C43 | C44 | Br8 | 119.1(6) |
| O3  | Sm1 | N1  | 136.16(13) | O10 | N10 | Sm2 | 59.7(3)  |
| N3  | Sm1 | N2  | 132.33(14) | O9  | N10 | Sm2 | 57.6(3)  |
| O4  | Sm1 | N3  | 113.25(12) | O9  | N10 | O10 | 117.3(5) |
| O4  | Sm1 | N2  | 113.25(12) | O11 | N10 | Sm2 | 179.1(5) |
| O6  | Sm1 | O3  | 74.09(14)  | O11 | N10 | O10 | 120.2(6) |
| O6  | Sm1 | N3  | 73.78(14)  | O11 | N10 | O9  | 122.4(5) |
| O6  | Sm1 | N2  | 116.36(14) | N3  | C23 | C24 | 116.7(4) |
| O6  | Sm1 | O4  | 67.01(11)  | N3  | C23 | C22 | 122.3(5) |
| O6  | Sm1 | N4  | 92.57(13)  | C22 | C23 | C24 | 121.1(4) |
| O6  | Sm1 | N1  | 149.14(14) | C9  | C8  | C7  | 118.9(6) |
| N4  | Sm1 | N3  | 61.98(13)  | C40 | C39 | C38 | 119.2(6) |
| N4  | Sm1 | N2  | 149.65(13) | N9  | C55 | C54 | 116.4(4) |
| N4  | Sm1 | O4  | 68.16(12)  | N9  | C55 | C56 | 121.9(5) |
| N1  | Sm1 | N3  | 76.16(13)  | C56 | C55 | C54 | 121.7(5) |
| N1  | Sm1 | N2  | 79.76(13)  | C22 | C21 | C30 | 121.5(5) |
| N1  | Sm1 | O4  | 133.41(12) | C20 | C21 | C22 | 116.6(5) |
| N1  | Sm1 | N4  | 79.26(13)  | C20 | C21 | C30 | 121.9(5) |
| O7  | Sm2 | O8  | 134.90(12) | N2  | C15 | C10 | 115.2(4) |
| O7  | Sm2 | O10 | 135.28(13) | N2  | C15 | C14 | 122.3(5) |
| O7  | Sm2 | N6  | 64.68(12)  | C14 | C15 | C10 | 122.5(5) |
| O7  | Sm2 | N9  | 137.15(13) | N1  | C6  | C5  | 122.8(5) |
| O7  | Sm2 | O9  | 91.70(14)  | N1  | C6  | C1  | 115.1(5) |
| O7  | Sm2 | O12 | 80.32(13)  | C5  | C6  | C1  | 122.2(5) |
| O7  | Sm2 | N8  | 75.01(13)  | C4  | C5  | C6  | 117.4(6) |
| O7  | Sm2 | N7  | 87.58(14)  | C4  | C5  | C9  | 126.5(6) |
| O7  | Sm2 | N10 | 113.74(15) | C9  | C5  | C6  | 116.0(6) |
| O8  | Sm2 | O10 | 73.54(12)  | N6  | C37 | C36 | 123.1(5) |
| O8  | Sm2 | N6  | 73.88(13)  | N6  | C37 | C32 | 115.1(4) |
| O8  | Sm2 | N9  | 76.96(13)  | C36 | C37 | C32 | 121.7(5) |
| O8  | Sm2 | O9  | 87.46(15)  | C21 | C22 | C23 | 120.6(5) |
| O8  | Sm2 | O12 | 140.56(13) | C45 | C46 | C41 | 121.8(6) |
| O8  | Sm2 | N8  | 127.58(13) | N7  | C46 | C45 | 122.5(5) |
| O8  | Sm2 | N7  | 65.90(14)  | N7  | C46 | C41 | 115.6(5) |
| O8  | Sm2 | N10 | 79.98(14)  | N6  | C38 | C39 | 122.7(6) |
| O10 | Sm2 | N6  | 108.24(12) | N8  | C54 | C55 | 116.6(4) |
| O10 | Sm2 | N9  | 72.21(13)  | N8  | C54 | C53 | 121.8(5) |
| O10 | Sm2 | N8  | 118.37(13) | C53 | C54 | C55 | 121.5(5) |
| O10 | Sm2 | N7  | 135.80(14) | C35 | C34 | C33 | 119.8(5) |
| O10 | Sm2 | N10 | 25.22(13)  | C59 | C58 | C57 | 119.6(6) |
| N6  | Sm2 | N8  | 132.28(13) | C26 | C25 | C24 | 120.7(5) |

|     |     |     |            |     |     |     |          |
|-----|-----|-----|------------|-----|-----|-----|----------|
| N6  | Sm2 | N10 | 87.32(14)  | C26 | C27 | C28 | 120.4(5) |
| N9  | Sm2 | N6  | 149.15(14) | C5  | C4  | Br2 | 120.6(5) |
| N9  | Sm2 | N8  | 62.14(14)  | C3  | C4  | C5  | 121.7(6) |
| N9  | Sm2 | N10 | 97.41(15)  | C3  | C4  | Br2 | 117.8(5) |
| O9  | Sm2 | O10 | 49.99(13)  | C35 | C36 | C37 | 118.3(5) |
| O9  | Sm2 | N6  | 66.56(13)  | C35 | C36 | C40 | 125.6(5) |
| O9  | Sm2 | N9  | 122.17(14) | C40 | C36 | C37 | 116.1(5) |
| O9  | Sm2 | N8  | 141.37(15) | C48 | C49 | C45 | 120.4(7) |
| O9  | Sm2 | N7  | 139.89(14) | O7  | C32 | C33 | 125.1(5) |
| O9  | Sm2 | N10 | 24.77(13)  | O7  | C32 | C37 | 119.4(5) |
| O12 | Sm2 | O10 | 67.40(12)  | C33 | C32 | C37 | 115.4(5) |
| O12 | Sm2 | N6  | 123.37(14) | O2  | C10 | C15 | 119.6(5) |
| O12 | Sm2 | N9  | 86.03(14)  | O2  | C10 | C11 | 124.1(6) |
| O12 | Sm2 | O9  | 71.87(15)  | C11 | C10 | C15 | 116.2(5) |
| O12 | Sm2 | N8  | 70.21(15)  | C17 | C18 | C14 | 120.4(6) |
| O12 | Sm2 | N7  | 146.69(15) | C41 | C42 | C43 | 123.5(6) |
| O12 | Sm2 | N10 | 67.12(14)  | C41 | C42 | Br7 | 118.7(5) |
| N8  | Sm2 | N10 | 133.69(13) | C43 | C42 | Br7 | 117.8(5) |
| N7  | Sm2 | N6  | 77.13(13)  | C25 | C26 | C29 | 121.6(5) |
| N7  | Sm2 | N9  | 82.02(14)  | C27 | C26 | C25 | 117.1(5) |
| N7  | Sm2 | N8  | 76.72(14)  | C27 | C26 | C29 | 121.3(6) |
| N7  | Sm2 | N10 | 145.19(15) | O8  | C41 | C46 | 120.1(5) |
| C10 | O2  | Sm1 | 126.8(3)   | O8  | C41 | C42 | 124.3(5) |
| C32 | O7  | Sm2 | 126.2(3)   | C42 | C41 | C46 | 115.7(5) |
| C1  | O1  | Sm1 | 124.4(3)   | N4  | C28 | C27 | 122.8(5) |
| C41 | O8  | Sm2 | 124.5(3)   | C13 | C14 | C15 | 116.9(6) |
| N5  | O3  | Sm1 | 99.1(3)    | C18 | C14 | C13 | 126.5(6) |
| C19 | N3  | Sm1 | 121.5(3)   | C18 | C14 | C15 | 116.5(6) |
| C19 | N3  | C23 | 116.8(4)   | N2  | C16 | C17 | 121.6(6) |
| C23 | N3  | Sm1 | 119.5(3)   | C3  | C2  | Br1 | 119.9(5) |
| N10 | O10 | Sm2 | 95.1(3)    | C3  | C2  | C1  | 122.3(6) |
| C15 | N2  | Sm1 | 113.6(3)   | C1  | C2  | Br1 | 117.8(4) |
| C16 | N2  | Sm1 | 127.0(4)   | C4  | C3  | C2  | 120.5(6) |
| C16 | N2  | C15 | 119.0(5)   | C52 | C53 | C54 | 120.5(5) |
| N5  | O4  | Sm1 | 95.1(3)    | N7  | C47 | C48 | 121.3(7) |
| C37 | N6  | Sm2 | 114.1(3)   | C19 | C20 | C21 | 120.5(5) |
| C38 | N6  | Sm2 | 127.3(4)   | N1  | C7  | C8  | 123.2(6) |
| C38 | N6  | C37 | 118.2(5)   | N8  | C50 | C51 | 122.7(6) |
| O3  | N5  | O4  | 116.8(5)   | C58 | C57 | C61 | 121.4(6) |
| O5  | N5  | O3  | 121.8(5)   | C56 | C57 | C58 | 117.1(5) |
| O5  | N5  | O4  | 121.4(5)   | C56 | C57 | C61 | 121.4(6) |
| C31 | O6  | Sm1 | 134.7(4)   | O1  | C1  | C6  | 120.1(5) |
| C24 | N4  | Sm1 | 122.4(3)   | O1  | C1  | C2  | 124.3(5) |
| C28 | N4  | Sm1 | 119.9(3)   | C2  | C1  | C6  | 115.6(5) |
| C28 | N4  | C24 | 117.6(4)   | C8  | C9  | C5  | 121.1(6) |

|     |     |     |          |     |     |     |          |
|-----|-----|-----|----------|-----|-----|-----|----------|
| C55 | N9  | Sm2 | 122.9(3) | C52 | C51 | C50 | 120.5(6) |
| C59 | N9  | Sm2 | 119.9(3) | C53 | C52 | C60 | 121.6(6) |
| C59 | N9  | C55 | 117.2(4) | C51 | C52 | C53 | 117.0(5) |
| N10 | O9  | Sm2 | 97.6(3)  | C51 | C52 | C60 | 121.4(7) |
| C34 | C35 | C36 | 121.1(5) | C13 | C12 | C11 | 119.7(6) |
| C34 | C35 | Br6 | 118.2(5) | C10 | C11 | C12 | 122.3(6) |
| C36 | C35 | Br6 | 120.6(5) | C10 | C11 | Br3 | 118.5(5) |
| C34 | C33 | Br5 | 118.4(4) | C12 | C11 | Br3 | 119.2(5) |
| C32 | C33 | Br5 | 117.7(4) | C44 | C43 | C42 | 119.4(6) |
| C32 | C33 | C34 | 123.7(5) | C18 | C17 | C16 | 120.1(6) |
| N3  | C19 | C20 | 123.2(5) | C57 | C56 | C55 | 121.0(5) |
| C62 | O12 | Sm2 | 134.5(4) | N9  | C59 | C58 | 123.2(5) |
| C54 | N8  | Sm2 | 118.7(3) | C39 | C40 | C36 | 120.7(5) |
| C54 | N8  | C50 | 117.4(5) | C49 | C48 | C47 | 121.5(7) |

**Table S7.** Crystal data and structure refinement details for **MeMBrQ-Ho**.

|                                      |                                                                                 |
|--------------------------------------|---------------------------------------------------------------------------------|
| Empirical formula                    | C <sub>32</sub> H <sub>24</sub> Br <sub>4</sub> HoN <sub>5</sub> O <sub>5</sub> |
| Formula weight                       | 1043.13                                                                         |
| Temperature/K                        | 293(2)                                                                          |
| Crystal system                       | orthorhombic                                                                    |
| Space group                          | Pccn                                                                            |
| a/Å                                  | 29.5503(11)                                                                     |
| b/Å                                  | 29.9584(12)                                                                     |
| c/Å                                  | 16.0497(6)                                                                      |
| α/°                                  | 90                                                                              |
| β/°                                  | 90                                                                              |
| γ/°                                  | 90                                                                              |
| Volume/Å <sup>3</sup>                | 14208.5(9)                                                                      |
| Z                                    | 16                                                                              |
| ρ <sub>calc</sub> /g/cm <sup>3</sup> | 1.951                                                                           |
| μ/mm <sup>-1</sup>                   | 6.773                                                                           |
| F(000)                               | 7968.0                                                                          |
| Crystal size/mm <sup>3</sup>         | 0.21 × 0.15 × 0.11                                                              |
| Radiation                            | MoKα (λ = 0.71073)                                                              |
| 2θ range for data collection/°       | 5.922 to 55.112                                                                 |
| Index ranges                         | -38 ≤ h ≤ 38, -38 ≤ k ≤ 38, -20 ≤ l ≤ 20                                        |
| Reflections collected                | 219785                                                                          |
| Independent reflections              | 16361 [R <sub>int</sub> = 0.1437, R <sub>sigma</sub> = 0.0811]                  |
| Data/restraints/parameters           | 16361/0/855                                                                     |
| Goodness-of-fit on F <sup>2</sup>    | 1.037                                                                           |
| Final R indexes [I ≥ 2σ (I)]         | R <sub>1</sub> = 0.0546, wR <sub>2</sub> = 0.0767                               |
| Final R indexes [all data]           | R <sub>1</sub> = 0.1372, wR <sub>2</sub> = 0.0951                               |

**Table S8.** Selected bond lengths (Å) for **MeMBrQ-Ho**.

| <b>Atom</b> | <b>Atom</b> | <b>Length/Å</b> | <b>Atom</b> | <b>Atom</b> | <b>Length/Å</b> |
|-------------|-------------|-----------------|-------------|-------------|-----------------|
| Ho2         | O6          | 2.195(4)        | C52         | C51         | 1.357(9)        |
| Ho2         | O7          | 2.183(4)        | N9          | C59         | 1.353(7)        |
| Ho2         | N6          | 2.601(4)        | N9          | C63         | 1.339(7)        |
| Ho2         | O8          | 2.481(5)        | C50         | C51         | 1.396(8)        |
| Ho2         | N7          | 2.594(5)        | O3          | N5          | 1.247(8)        |
| Ho2         | O9          | 2.419(5)        | C28         | C29         | 1.368(9)        |
| Ho2         | N8          | 2.513(4)        | C28         | C31         | 1.509(9)        |
| Ho2         | N9          | 2.521(5)        | C28         | C27         | 1.371(9)        |
| Ho2         | N10         | 2.873(7)        | C59         | C60         | 1.387(7)        |
| Ho1         | O2          | 2.158(4)        | C43         | C44         | 1.495(9)        |
| Ho1         | N2          | 2.608(5)        | C38         | C33         | 1.440(8)        |
| Ho1         | O4          | 2.473(5)        | C38         | C37         | 1.407(8)        |
| Ho1         | O1          | 2.196(4)        | C45         | C44         | 1.417(8)        |
| Ho1         | N1          | 2.594(5)        | C45         | C46         | 1.352(9)        |
| Ho1         | N4          | 2.507(5)        | C33         | C34         | 1.377(8)        |
| Ho1         | O3          | 2.446(5)        | C60         | C61         | 1.378(8)        |
| Ho1         | N3          | 2.492(5)        | C6          | C1          | 1.431(8)        |
| Ho1         | N5          | 2.890(8)        | C6          | C5          | 1.422(8)        |
| Br5         | C50         | 1.891(6)        | C47         | C46         | 1.391(8)        |
| Br6         | C52         | 1.909(6)        | C16         | C15         | 1.422(9)        |
| Br8         | C34         | 1.895(7)        | C16         | C11         | 1.433(9)        |
| Br4         | C12         | 1.883(7)        | C15         | C14         | 1.415(11)       |
| Br7         | C36         | 1.899(7)        | C15         | C19         | 1.411(11)       |
| Br1         | C2          | 1.885(7)        | C1          | C2          | 1.377(9)        |
| O6          | C49         | 1.301(6)        | C37         | C36         | 1.410(9)        |
| O7          | C33         | 1.298(7)        | C37         | C41         | 1.413(10)       |
| O10         | N10         | 1.213(7)        | C11         | C12         | 1.375(9)        |
| N6          | C48         | 1.373(7)        | C61         | C62         | 1.365(9)        |
| N6          | C44         | 1.330(7)        | C61         | C64         | 1.499(8)        |
| O2          | C11         | 1.311(7)        | N3          | C21         | 1.343(8)        |
| C48         | C49         | 1.428(8)        | C5          | C4          | 1.401(10)       |
| C48         | C47         | 1.423(7)        | C5          | C9          | 1.404(10)       |
| N2          | C16         | 1.374(8)        | C2          | C3          | 1.390(9)        |
| N2          | C17         | 1.336(8)        | C36         | C35         | 1.357(9)        |
| C49         | C50         | 1.381(8)        | C14         | C13         | 1.349(10)       |
| O4          | N5          | 1.270(8)        | C14         | Br3         | 1.899(7)        |
| O5          | N5          | 1.216(8)        | C12         | C13         | 1.395(9)        |
| O1          | C1          | 1.308(7)        | C34         | C35         | 1.392(9)        |

---

|     |     |          |     |     |           |
|-----|-----|----------|-----|-----|-----------|
| N1  | C6  | 1.374(8) | C26 | C27 | 1.386(8)  |
| N1  | C7  | 1.338(8) | C30 | C29 | 1.377(9)  |
| C25 | N3  | 1.355(7) | C39 | C40 | 1.403(9)  |
| C25 | C26 | 1.484(9) | C39 | C42 | 1.505(9)  |
| C25 | C24 | 1.384(8) | C4  | Br2 | 1.896(6)  |
| O8  | N10 | 1.256(7) | C4  | C3  | 1.361(10) |
| N7  | C38 | 1.386(8) | C17 | C18 | 1.402(11) |
| N7  | C39 | 1.330(8) | C17 | C20 | 1.497(10) |
| O9  | N10 | 1.264(7) | C63 | C62 | 1.375(9)  |
| N8  | C56 | 1.350(7) | C23 | C22 | 1.359(9)  |
| N8  | C57 | 1.336(7) | C23 | C32 | 1.517(9)  |
| N4  | C26 | 1.345(7) | C23 | C24 | 1.375(9)  |
| N4  | C30 | 1.332(8) | C7  | C8  | 1.406(9)  |
| C56 | C59 | 1.469(8) | C7  | C10 | 1.475(9)  |
| C56 | C55 | 1.386(7) | C41 | C40 | 1.339(10) |
| C54 | C55 | 1.375(8) | C22 | C21 | 1.375(9)  |
| C54 | C58 | 1.376(8) | C9  | C8  | 1.341(10) |
| C54 | C53 | 1.508(8) | C58 | C57 | 1.379(8)  |
| C52 | C47 | 1.415(9) | C18 | C19 | 1.321(11) |

**Table S9.** Selected bond angles (°) for **MeMBrQ-Ho**.

| Atom | Atom | Atom | Angle/°    | Atom | Atom | Atom | Angle/°  |
|------|------|------|------------|------|------|------|----------|
| O6   | Ho2  | N6   | 67.48(14)  | C49  | C50  | Br5  | 118.1(4) |
| O6   | Ho2  | O8   | 81.18(17)  | C49  | C50  | C51  | 123.1(6) |
| O6   | Ho2  | N7   | 81.55(15)  | C51  | C50  | Br5  | 118.8(5) |
| O6   | Ho2  | O9   | 131.62(17) | N5   | O3   | Ho1  | 97.7(5)  |
| O6   | Ho2  | N8   | 78.00(14)  | C29  | C28  | C31  | 121.7(7) |
| O6   | Ho2  | N9   | 136.81(14) | C29  | C28  | C27  | 117.5(6) |
| O6   | Ho2  | N10  | 106.20(19) | C27  | C28  | C31  | 120.8(7) |
| O7   | Ho2  | O6   | 127.66(15) | N9   | C59  | C56  | 116.3(5) |
| O7   | Ho2  | N6   | 81.02(14)  | N9   | C59  | C60  | 120.7(5) |
| O7   | Ho2  | O8   | 129.14(16) | C60  | C59  | C56  | 123.0(5) |
| O7   | Ho2  | N7   | 67.57(16)  | O10  | N10  | Ho2  | 176.9(5) |
| O7   | Ho2  | O9   | 84.40(17)  | O10  | N10  | O8   | 121.8(7) |
| O7   | Ho2  | N8   | 141.35(15) | O10  | N10  | O9   | 122.4(8) |
| O7   | Ho2  | N9   | 79.61(15)  | O8   | N10  | Ho2  | 59.4(3)  |
| O7   | Ho2  | N10  | 106.64(18) | O8   | N10  | O9   | 115.8(6) |
| N6   | Ho2  | N10  | 77.96(14)  | O9   | N10  | Ho2  | 56.6(3)  |
| O8   | Ho2  | N6   | 73.43(14)  | N7   | C38  | C33  | 115.4(6) |

|    |     |     |            |     |     |     |          |
|----|-----|-----|------------|-----|-----|-----|----------|
| O8 | Ho2 | N7  | 161.59(17) | N7  | C38 | C37 | 123.5(6) |
| O8 | Ho2 | N8  | 77.49(15)  | C37 | C38 | C33 | 121.1(6) |
| O8 | Ho2 | N9  | 108.24(16) | C46 | C45 | C44 | 121.7(6) |
| O8 | Ho2 | N10 | 25.83(16)  | N6  | C44 | C43 | 120.2(5) |
| N7 | Ho2 | N6  | 105.52(14) | N6  | C44 | C45 | 120.3(6) |
| N7 | Ho2 | N10 | 172.25(19) | C45 | C44 | C43 | 119.4(6) |
| O9 | Ho2 | N6  | 87.00(15)  | O7  | C33 | C38 | 119.5(6) |
| O9 | Ho2 | O8  | 51.64(17)  | O7  | C33 | C34 | 124.0(6) |
| O9 | Ho2 | N7  | 146.46(18) | C34 | C33 | C38 | 116.5(6) |
| O9 | Ho2 | N8  | 98.67(16)  | C61 | C60 | C59 | 121.4(6) |
| O9 | Ho2 | N9  | 76.48(17)  | N1  | C6  | C1  | 116.3(5) |
| O9 | Ho2 | N10 | 25.87(16)  | N1  | C6  | C5  | 122.4(6) |
| N8 | Ho2 | N6  | 137.45(15) | C5  | C6  | C1  | 121.3(6) |
| N8 | Ho2 | N7  | 92.72(15)  | C52 | C47 | C48 | 116.9(6) |
| N8 | Ho2 | N9  | 64.04(15)  | C46 | C47 | C48 | 117.7(6) |
| N8 | Ho2 | N10 | 89.05(15)  | C46 | C47 | C52 | 125.4(6) |
| N9 | Ho2 | N6  | 155.59(15) | N2  | C16 | C15 | 123.2(6) |
| N9 | Ho2 | N7  | 80.51(15)  | N2  | C16 | C11 | 115.9(6) |
| N9 | Ho2 | N10 | 93.52(17)  | C15 | C16 | C11 | 120.8(7) |
| O2 | Ho1 | N2  | 67.80(16)  | C14 | C15 | C16 | 117.1(7) |
| O2 | Ho1 | O4  | 133.55(19) | C19 | C15 | C16 | 115.9(8) |
| O2 | Ho1 | O1  | 121.53(16) | C19 | C15 | C14 | 127.0(8) |
| O2 | Ho1 | N1  | 79.39(16)  | O1  | C1  | C6  | 119.3(6) |
| O2 | Ho1 | N4  | 80.35(16)  | O1  | C1  | C2  | 124.1(6) |
| O2 | Ho1 | O3  | 87.72(19)  | C2  | C1  | C6  | 116.5(6) |
| O2 | Ho1 | N3  | 139.67(17) | C38 | C37 | C36 | 118.1(6) |
| O2 | Ho1 | N5  | 111.1(2)   | C38 | C37 | C41 | 116.2(7) |
| N2 | Ho1 | N5  | 169.84(18) | C36 | C37 | C41 | 125.7(7) |
| O4 | Ho1 | N2  | 158.3(2)   | O2  | C11 | C16 | 119.6(6) |
| O4 | Ho1 | N1  | 76.70(16)  | O2  | C11 | C12 | 123.1(6) |
| O4 | Ho1 | N4  | 101.94(18) | C12 | C11 | C16 | 117.3(6) |
| O4 | Ho1 | N3  | 75.10(18)  | C60 | C61 | C64 | 120.4(6) |
| O4 | Ho1 | N5  | 25.92(19)  | C62 | C61 | C60 | 116.9(6) |
| O1 | Ho1 | N2  | 78.80(17)  | C62 | C61 | C64 | 122.7(7) |
| O1 | Ho1 | O4  | 84.4(2)    | C54 | C55 | C56 | 121.2(5) |
| O1 | Ho1 | N1  | 67.51(16)  | C25 | N3  | Ho1 | 122.0(4) |
| O1 | Ho1 | N4  | 142.83(15) | C21 | N3  | Ho1 | 120.4(4) |
| O1 | Ho1 | O3  | 132.79(19) | C21 | N3  | C25 | 117.5(6) |
| O1 | Ho1 | N3  | 82.98(17)  | C4  | C5  | C6  | 117.7(6) |
| O1 | Ho1 | N5  | 109.3(2)   | C4  | C5  | C9  | 125.8(6) |
| N1 | Ho1 | N2  | 108.71(16) | C9  | C5  | C6  | 116.5(7) |
| N1 | Ho1 | N5  | 80.57(16)  | C1  | C2  | Br1 | 118.7(5) |
| N4 | Ho1 | N2  | 83.91(16)  | C1  | C2  | C3  | 123.0(7) |
| N4 | Ho1 | N1  | 149.66(17) | C3  | C2  | Br1 | 118.3(6) |
| N4 | Ho1 | N5  | 85.95(19)  | C37 | C36 | Br7 | 119.6(6) |

|     |     |     |            |     |     |     |          |
|-----|-----|-----|------------|-----|-----|-----|----------|
| O3  | Ho1 | N2  | 148.15(19) | C35 | C36 | Br7 | 118.9(6) |
| O3  | Ho1 | O4  | 51.2(2)    | C35 | C36 | C37 | 121.6(6) |
| O3  | Ho1 | N1  | 85.15(18)  | C15 | C14 | Br3 | 118.8(7) |
| O3  | Ho1 | N4  | 71.69(18)  | C13 | C14 | C15 | 122.5(7) |
| O3  | Ho1 | N3  | 97.75(19)  | C13 | C14 | Br3 | 118.6(7) |
| O3  | Ho1 | N5  | 25.33(19)  | C11 | C12 | Br4 | 118.6(5) |
| N3  | Ho1 | N2  | 89.24(18)  | C11 | C12 | C13 | 122.9(7) |
| N3  | Ho1 | N1  | 140.74(17) | C13 | C12 | Br4 | 118.5(6) |
| N3  | Ho1 | N4  | 64.01(17)  | C33 | C34 | Br8 | 118.4(5) |
| N3  | Ho1 | N5  | 85.73(18)  | C33 | C34 | C35 | 123.1(6) |
| C49 | O6  | Ho2 | 125.8(4)   | C35 | C34 | Br8 | 118.5(5) |
| C33 | O7  | Ho2 | 126.6(4)   | N4  | C26 | C25 | 115.4(5) |
| C48 | N6  | Ho2 | 110.5(3)   | N4  | C26 | C27 | 121.9(6) |
| C44 | N6  | Ho2 | 130.3(4)   | C27 | C26 | C25 | 122.6(6) |
| C44 | N6  | C48 | 119.0(5)   | N4  | C30 | C29 | 124.0(6) |
| C11 | O2  | Ho1 | 126.2(4)   | N7  | C39 | C40 | 122.0(7) |
| N6  | C48 | C49 | 116.3(5)   | N7  | C39 | C42 | 118.6(6) |
| N6  | C48 | C47 | 122.0(5)   | C40 | C39 | C42 | 119.3(7) |
| C47 | C48 | C49 | 121.7(6)   | C5  | C4  | Br2 | 120.4(6) |
| C16 | N2  | Ho1 | 109.9(4)   | C3  | C4  | C5  | 121.6(6) |
| C17 | N2  | Ho1 | 132.8(5)   | C3  | C4  | Br2 | 118.0(6) |
| C17 | N2  | C16 | 117.2(6)   | N2  | C17 | C18 | 122.0(8) |
| O6  | C49 | C48 | 119.9(5)   | N2  | C17 | C20 | 118.3(7) |
| O6  | C49 | C50 | 123.4(5)   | C18 | C17 | C20 | 119.7(8) |
| C50 | C49 | C48 | 116.7(5)   | N9  | C63 | C62 | 123.3(6) |
| N5  | O4  | Ho1 | 95.7(5)    | C36 | C35 | C34 | 119.5(7) |
| C1  | O1  | Ho1 | 125.9(4)   | C22 | C23 | C32 | 121.7(7) |
| C6  | N1  | Ho1 | 110.9(4)   | C22 | C23 | C24 | 117.3(6) |
| C7  | N1  | Ho1 | 130.1(5)   | C24 | C23 | C32 | 121.0(6) |
| C7  | N1  | C6  | 119.0(5)   | N1  | C7  | C8  | 120.2(7) |
| N3  | C25 | C26 | 115.7(5)   | N1  | C7  | C10 | 119.7(6) |
| N3  | C25 | C24 | 120.6(6)   | C8  | C7  | C10 | 120.1(7) |
| C24 | C25 | C26 | 123.6(6)   | C40 | C41 | C37 | 120.1(7) |
| N10 | O8  | Ho2 | 94.8(4)    | C23 | C22 | C21 | 120.1(7) |
| C38 | N7  | Ho2 | 110.7(4)   | C41 | C40 | C39 | 121.0(7) |
| C39 | N7  | Ho2 | 131.9(5)   | O4  | N5  | Ho1 | 58.4(4)  |
| C39 | N7  | C38 | 117.1(6)   | O5  | N5  | Ho1 | 179.6(7) |
| N10 | O9  | Ho2 | 97.6(4)    | O5  | N5  | O4  | 121.7(9) |
| C56 | N8  | Ho2 | 121.8(4)   | O5  | N5  | O3  | 122.9(9) |
| C57 | N8  | Ho2 | 120.8(4)   | O3  | N5  | Ho1 | 57.0(4)  |
| C57 | N8  | C56 | 117.3(5)   | O3  | N5  | O4  | 115.4(7) |
| C26 | N4  | Ho1 | 122.0(4)   | C8  | C9  | C5  | 120.0(7) |
| C30 | N4  | Ho1 | 121.3(4)   | C54 | C58 | C57 | 119.5(6) |
| C30 | N4  | C26 | 116.7(5)   | N3  | C21 | C22 | 123.1(7) |
| N8  | C56 | C59 | 116.0(5)   | C45 | C46 | C47 | 119.1(6) |

|     |     |     |          |     |     |     |          |
|-----|-----|-----|----------|-----|-----|-----|----------|
| N8  | C56 | C55 | 121.2(6) | C52 | C51 | C50 | 119.3(6) |
| C55 | C56 | C59 | 122.7(5) | C28 | C29 | C30 | 119.3(7) |
| C55 | C54 | C58 | 117.1(5) | C14 | C13 | C12 | 119.3(7) |
| C55 | C54 | C53 | 121.0(6) | N8  | C57 | C58 | 123.7(6) |
| C58 | C54 | C53 | 121.9(6) | C9  | C8  | C7  | 121.9(7) |
| C47 | C52 | Br6 | 119.4(5) | C19 | C18 | C17 | 121.2(8) |
| C51 | C52 | Br6 | 118.3(5) | C61 | C62 | C63 | 120.1(7) |
| C51 | C52 | C47 | 122.3(6) | C28 | C27 | C26 | 120.5(6) |
| C59 | N9  | Ho2 | 120.8(4) | C23 | C24 | C25 | 121.4(6) |
| C63 | N9  | Ho2 | 121.1(4) | C4  | C3  | C2  | 119.7(7) |
| C63 | N9  | C59 | 117.5(5) | C18 | C19 | C15 | 120.5(8) |

**Table S10.** Crystal data and structure refinement details for **MeMBrQ-Lu**.

|                                             |                                                                                 |
|---------------------------------------------|---------------------------------------------------------------------------------|
| Empirical formula                           | C <sub>32</sub> H <sub>24</sub> Br <sub>4</sub> LuN <sub>5</sub> O <sub>5</sub> |
| Formula weight                              | 1053.17                                                                         |
| Temperature/K                               | 293(2)                                                                          |
| Crystal system                              | orthorhombic                                                                    |
| Space group                                 | Pccn                                                                            |
| a/Å                                         | 29.587(3)                                                                       |
| b/Å                                         | 29.910(3)                                                                       |
| c/Å                                         | 15.9860(18)                                                                     |
| α/°                                         | 90                                                                              |
| β/°                                         | 90                                                                              |
| γ/°                                         | 90                                                                              |
| Volume/Å <sup>3</sup>                       | 14147(3)                                                                        |
| Z                                           | 16                                                                              |
| ρ <sub>calc</sub> /g/cm <sup>3</sup>        | 1.978                                                                           |
| μ/mm <sup>-1</sup>                          | 7.356                                                                           |
| F(000)                                      | 8032.0                                                                          |
| Crystal size/mm <sup>3</sup>                | 0.26 × 0.21 × 0.14                                                              |
| Radiation                                   | MoKα (λ = 0.71073)                                                              |
| 2θ range for data collection/°              | 5.78 to 55.146                                                                  |
| Index ranges                                | -38 ≤ h ≤ 38, -38 ≤ k ≤ 36, -20 ≤ l ≤ 20                                        |
| Reflections collected                       | 216179                                                                          |
| Independent reflections                     | 16325 [R <sub>int</sub> = 0.1341, R <sub>sigma</sub> = 0.0726]                  |
| Data/restraints/parameters                  | 16325/0/855                                                                     |
| Goodness-of-fit on F <sup>2</sup>           | 1.082                                                                           |
| Final R indexes [I >= 2σ (I)]               | R <sub>1</sub> = 0.0731, wR <sub>2</sub> = 0.1615                               |
| Final R indexes [all data]                  | R <sub>1</sub> = 0.1374, wR <sub>2</sub> = 0.1922                               |
| Largest diff. peak/hole / e Å <sup>-3</sup> | 2.71/-1.15                                                                      |

**Table S11.** Selected bond lengths (Å) for **MeMBrQ-Lu**.



| Atom | Atom | Length/Å  | Atom | Atom | Length/Å  |
|------|------|-----------|------|------|-----------|
| Lu1  | O1   | 2.157(7)  | N8   | C57  | 1.347(13) |
| Lu1  | O2   | 2.139(7)  | N8   | C53  | 1.335(15) |
| Lu1  | N1   | 2.581(7)  | O8   | N10  | 1.253(15) |
| Lu1  | N4   | 2.485(7)  | C5   | C10  | 1.406(16) |
| Lu1  | O4   | 2.448(8)  | C5   | C6   | 1.419(12) |
| Lu1  | N3   | 2.468(8)  | C5   | C4   | 1.410(15) |
| Lu1  | N5   | 2.833(11) | N5   | O3   | 1.265(13) |
| Lu1  | N2   | 2.550(9)  | N9   | C58  | 1.340(12) |
| Lu1  | O3   | 2.367(8)  | N9   | C62  | 1.341(15) |
| Lu2  | O7   | 2.120(7)  | O9   | N10  | 1.257(15) |
| Lu2  | O6   | 2.167(8)  | C9   | C10  | 1.366(16) |
| Lu2  | N6   | 2.579(8)  | C9   | C8   | 1.393(15) |
| Lu2  | N7   | 2.565(9)  | C15  | C16  | 1.420(15) |
| Lu2  | N8   | 2.443(9)  | C15  | C20  | 1.410(17) |
| Lu2  | O8   | 2.443(10) | C15  | C14  | 1.381(17) |
| Lu2  | N9   | 2.467(9)  | C60  | C64  | 1.519(17) |
| Lu2  | O9   | 2.388(9)  | C60  | C59  | 1.393(18) |
| Lu2  | N10  | 2.835(11) | C60  | C61  | 1.353(18) |
| Br2  | C8   | 1.902(10) | C28  | C29  | 1.372(16) |
| Br1  | C10  | 1.904(9)  | C28  | C32  | 1.495(16) |
| Br8  | C52  | 1.899(11) | C23  | C22  | 1.370(15) |
| Br6  | C42  | 1.900(10) | C23  | C31  | 1.527(14) |
| Br7  | C50  | 1.905(12) | C16  | N2   | 1.392(14) |
| Br3  | C18  | 1.898(12) | C16  | C17  | 1.426(14) |
| Br4  | C20  | 1.893(12) | C49  | C50  | 1.370(15) |
| Br5  | C40  | 1.876(12) | C49  | C48  | 1.415(15) |
| O1   | C7   | 1.292(11) | C42  | C41  | 1.366(19) |
| O2   | C17  | 1.310(12) | C42  | C37  | 1.405(18) |
| O7   | C49  | 1.313(12) | C36  | C37  | 1.379(17) |
| N1   | C6   | 1.366(12) | C36  | C35  | 1.35(2)   |
| N1   | C2   | 1.331(12) | N2   | C12  | 1.342(14) |
| O6   | C39  | 1.297(12) | C12  | C13  | 1.431(18) |
| C24  | C25  | 1.392(13) | C12  | C11  | 1.486(17) |
| C24  | C23  | 1.368(15) | C34  | C35  | 1.416(17) |
| O5   | N5   | 1.207(12) | C34  | C33  | 1.480(18) |
| O10  | N10  | 1.224(14) | C41  | C40  | 1.408(16) |
| N6   | C34  | 1.343(13) | C37  | C38  | 1.418(14) |
| N6   | C38  | 1.362(14) | C50  | C51  | 1.378(16) |
| C27  | C26  | 1.401(13) | C18  | C17  | 1.372(15) |
| C27  | C28  | 1.376(16) | C18  | C19  | 1.395(16) |
| N7   | C48  | 1.367(15) | C48  | C47  | 1.424(15) |
| N7   | C44  | 1.345(14) | C2   | C1   | 1.496(15) |
| C55  | C54  | 1.382(16) | C59  | C58  | 1.393(15) |
| C55  | C63  | 1.508(15) | C58  | C57  | 1.483(16) |

|     |     |           |     |     |           |
|-----|-----|-----------|-----|-----|-----------|
| C55 | C56 | 1.371(16) | C13 | C14 | 1.348(19) |
| N4  | C26 | 1.353(12) | C44 | C45 | 1.407(19) |
| N4  | C30 | 1.338(14) | C44 | C43 | 1.516(19) |
| O4  | N5  | 1.268(13) | C39 | C40 | 1.381(16) |
| C7  | C6  | 1.443(14) | C39 | C38 | 1.452(14) |
| C7  | C8  | 1.389(14) | C20 | C19 | 1.359(17) |
| C3  | C4  | 1.341(16) | C57 | C56 | 1.396(14) |
| C3  | C2  | 1.417(13) | C22 | C21 | 1.364(15) |
| C52 | C51 | 1.371(19) | C30 | C29 | 1.374(16) |
| C52 | C47 | 1.408(19) | C53 | C54 | 1.362(16) |
| N3  | C25 | 1.353(11) | C46 | C47 | 1.408(19) |
| N3  | C21 | 1.335(13) | C46 | C45 | 1.32(2)   |
| C25 | C26 | 1.470(15) | C62 | C61 | 1.357(17) |

**Table S12.** Selected bond angles (°) for **MeMBrQ-Lu**.

| Atom | Atom | Atom | Angle/°  | Atom | Atom | Atom | Angle/°   |
|------|------|------|----------|------|------|------|-----------|
| O1   | Lu1  | N1   | 68.4(2)  | O5   | N5   | O4   | 122.7(12) |
| O1   | Lu1  | N4   | 137.3(2) | O5   | N5   | O3   | 122.1(13) |
| O1   | Lu1  | O4   | 80.6(3)  | O4   | N5   | Lu1  | 59.6(5)   |
| O1   | Lu1  | N3   | 78.3(2)  | O3   | N5   | Lu1  | 55.9(5)   |
| O1   | Lu1  | N5   | 106.2(3) | O3   | N5   | O4   | 115.1(9)  |
| O1   | Lu1  | N2   | 80.8(3)  | C58  | N9   | Lu2  | 120.8(7)  |
| O1   | Lu1  | O3   | 132.1(3) | C58  | N9   | C62  | 117.0(9)  |
| O2   | Lu1  | O1   | 127.1(3) | C62  | N9   | Lu2  | 122.2(7)  |
| O2   | Lu1  | N1   | 79.9(3)  | N10  | O9   | Lu2  | 97.2(8)   |
| O2   | Lu1  | N4   | 79.6(3)  | C10  | C9   | C8   | 119.0(10) |
| O2   | Lu1  | O4   | 129.4(3) | C20  | C15  | C16  | 117.1(11) |
| O2   | Lu1  | N3   | 142.7(3) | C14  | C15  | C16  | 116.9(12) |
| O2   | Lu1  | N5   | 106.5(3) | C14  | C15  | C20  | 126.0(12) |
| O2   | Lu1  | N2   | 68.7(3)  | C59  | C60  | C64  | 119.9(13) |
| O2   | Lu1  | O3   | 84.3(3)  | C61  | C60  | C64  | 124.3(13) |
| N1   | Lu1  | N5   | 77.0(2)  | C61  | C60  | C59  | 115.8(11) |
| N4   | Lu1  | N1   | 154.2(3) | C27  | C28  | C32  | 120.2(11) |
| N4   | Lu1  | N5   | 94.0(3)  | C29  | C28  | C27  | 117.1(10) |
| N4   | Lu1  | N2   | 80.3(3)  | C29  | C28  | C32  | 122.7(12) |
| O4   | Lu1  | N1   | 72.9(2)  | C24  | C23  | C22  | 117.9(9)  |
| O4   | Lu1  | N4   | 109.2(3) | C24  | C23  | C31  | 120.6(10) |
| O4   | Lu1  | N3   | 76.1(3)  | C22  | C23  | C31  | 121.5(11) |
| O4   | Lu1  | N5   | 26.5(3)  | C15  | C16  | C17  | 121.6(10) |
| O4   | Lu1  | N2   | 160.0(3) | N2   | C16  | C15  | 122.4(10) |
| N3   | Lu1  | N1   | 137.4(3) | N2   | C16  | C17  | 116.0(10) |
| N3   | Lu1  | N4   | 65.0(3)  | C5   | C10  | Br1  | 119.9(8)  |

---

|    |     |     |          |     |     |     |           |
|----|-----|-----|----------|-----|-----|-----|-----------|
| N3 | Lu1 | N5  | 88.1(3)  | C9  | C10 | Br1 | 118.1(9)  |
| N3 | Lu1 | N2  | 93.0(3)  | C9  | C10 | C5  | 122.0(9)  |
| N2 | Lu1 | N1  | 106.5(2) | N1  | C6  | C7  | 115.3(8)  |
| N2 | Lu1 | N5  | 173.0(3) | N1  | C6  | C5  | 123.0(9)  |
| O3 | Lu1 | N1  | 86.4(3)  | C5  | C6  | C7  | 121.7(9)  |
| O3 | Lu1 | N4  | 76.0(3)  | O7  | C49 | C50 | 123.7(10) |
| O3 | Lu1 | O4  | 52.7(3)  | O7  | C49 | C48 | 118.9(10) |
| O3 | Lu1 | N3  | 97.5(3)  | C50 | C49 | C48 | 117.4(10) |
| O3 | Lu1 | N5  | 26.3(3)  | C41 | C42 | Br6 | 117.7(10) |
| O3 | Lu1 | N2  | 146.8(3) | C41 | C42 | C37 | 121.9(10) |
| O7 | Lu2 | O6  | 120.7(3) | C37 | C42 | Br6 | 120.4(10) |
| O7 | Lu2 | N6  | 77.9(3)  | C35 | C36 | C37 | 119.5(11) |
| O7 | Lu2 | N7  | 68.7(3)  | C16 | N2  | Lu1 | 110.0(6)  |
| O7 | Lu2 | N8  | 141.3(3) | C12 | N2  | Lu1 | 131.5(8)  |
| O7 | Lu2 | O8  | 133.4(3) | C12 | N2  | C16 | 118.3(10) |
| O7 | Lu2 | N9  | 80.4(3)  | N2  | C12 | C13 | 120.7(12) |
| O7 | Lu2 | O9  | 88.0(3)  | N2  | C12 | C11 | 119.9(11) |
| O7 | Lu2 | N10 | 111.3(4) | C13 | C12 | C11 | 119.4(11) |
| O6 | Lu2 | N6  | 68.5(3)  | N6  | C34 | C35 | 119.3(12) |
| O6 | Lu2 | N7  | 78.6(3)  | N6  | C34 | C33 | 120.3(10) |
| O6 | Lu2 | N8  | 83.1(3)  | C35 | C34 | C33 | 120.4(11) |
| O6 | Lu2 | O8  | 83.2(4)  | C42 | C41 | C40 | 120.3(12) |
| O6 | Lu2 | N9  | 143.1(3) | C3  | C4  | C5  | 119.5(9)  |
| O6 | Lu2 | O9  | 133.1(3) | C42 | C37 | C38 | 117.1(11) |
| O6 | Lu2 | N10 | 108.4(4) | C36 | C37 | C42 | 125.4(11) |
| N6 | Lu2 | N10 | 79.0(3)  | C36 | C37 | C38 | 117.5(12) |
| N7 | Lu2 | N6  | 109.7(3) | C49 | C50 | Br7 | 117.8(8)  |
| N7 | Lu2 | N10 | 170.7(3) | C49 | C50 | C51 | 124.4(12) |
| N8 | Lu2 | N6  | 140.7(3) | C51 | C50 | Br7 | 117.7(10) |
| N8 | Lu2 | N7  | 89.6(3)  | C7  | C8  | Br2 | 117.2(7)  |
| N8 | Lu2 | N9  | 65.0(3)  | C7  | C8  | C9  | 124.1(10) |
| N8 | Lu2 | N10 | 85.2(3)  | C9  | C8  | Br2 | 118.7(8)  |
| O8 | Lu2 | N6  | 75.5(3)  | N5  | O3  | Lu1 | 97.9(7)   |
| O8 | Lu2 | N7  | 157.2(4) | C17 | C18 | Br3 | 117.9(8)  |
| O8 | Lu2 | N8  | 74.6(3)  | C17 | C18 | C19 | 123.6(11) |
| O8 | Lu2 | N9  | 104.2(3) | C19 | C18 | Br3 | 118.5(9)  |
| O8 | Lu2 | N10 | 26.1(3)  | N7  | C48 | C49 | 116.9(10) |
| N9 | Lu2 | N6  | 148.3(3) | N7  | C48 | C47 | 122.7(11) |
| N9 | Lu2 | N7  | 82.9(3)  | C49 | C48 | C47 | 120.4(12) |
| N9 | Lu2 | N10 | 87.8(3)  | N1  | C2  | C3  | 119.8(10) |
| O9 | Lu2 | N6  | 84.8(3)  | N1  | C2  | C1  | 120.9(9)  |
| O9 | Lu2 | N7  | 148.2(3) | C3  | C2  | C1  | 119.3(9)  |
| O9 | Lu2 | N8  | 96.5(3)  | C58 | C59 | C60 | 120.5(11) |
| O9 | Lu2 | O8  | 52.2(4)  | N9  | C58 | C59 | 121.7(11) |
| O9 | Lu2 | N9  | 71.7(3)  | N9  | C58 | C57 | 116.4(9)  |

---

---

|     |     |     |           |     |     |     |           |
|-----|-----|-----|-----------|-----|-----|-----|-----------|
| O9  | Lu2 | N10 | 26.1(4)   | C59 | C58 | C57 | 121.9(10) |
| C7  | O1  | Lu1 | 125.4(6)  | C14 | C13 | C12 | 120.1(12) |
| C17 | O2  | Lu1 | 126.4(6)  | N7  | C44 | C45 | 121.6(13) |
| C49 | O7  | Lu2 | 126.1(6)  | N7  | C44 | C43 | 118.0(11) |
| C6  | N1  | Lu1 | 110.4(6)  | C45 | C44 | C43 | 120.4(12) |
| C2  | N1  | Lu1 | 130.3(7)  | O6  | C39 | C40 | 123.2(10) |
| C2  | N1  | C6  | 119.2(8)  | O6  | C39 | C38 | 120.5(10) |
| C39 | O6  | Lu2 | 124.8(7)  | C40 | C39 | C38 | 116.3(9)  |
| C23 | C24 | C25 | 119.9(9)  | C41 | C40 | Br5 | 118.4(10) |
| C34 | N6  | Lu2 | 130.0(8)  | C39 | C40 | Br5 | 119.4(8)  |
| C34 | N6  | C38 | 119.2(9)  | C39 | C40 | C41 | 122.1(11) |
| C38 | N6  | Lu2 | 110.9(6)  | N6  | C38 | C37 | 122.6(10) |
| C28 | C27 | C26 | 120.7(10) | N6  | C38 | C39 | 115.1(9)  |
| C48 | N7  | Lu2 | 109.3(6)  | C37 | C38 | C39 | 122.2(11) |
| C44 | N7  | Lu2 | 133.5(8)  | O2  | C17 | C16 | 118.7(9)  |
| C44 | N7  | C48 | 117.2(10) | O2  | C17 | C18 | 124.9(10) |
| C54 | C55 | C63 | 122.0(12) | C18 | C17 | C16 | 116.4(10) |
| C56 | C55 | C54 | 116.3(10) | C15 | C20 | Br4 | 119.5(9)  |
| C56 | C55 | C63 | 121.7(11) | C19 | C20 | Br4 | 118.4(9)  |
| C26 | N4  | Lu1 | 120.0(6)  | C19 | C20 | C15 | 122.1(11) |
| C30 | N4  | Lu1 | 121.5(7)  | N8  | C57 | C58 | 114.6(9)  |
| C30 | N4  | C26 | 117.8(8)  | N8  | C57 | C56 | 122.2(11) |
| N5  | O4  | Lu1 | 93.9(6)   | C56 | C57 | C58 | 123.0(10) |
| O1  | C7  | C6  | 120.5(9)  | O10 | N10 | Lu2 | 178.0(13) |
| O1  | C7  | C8  | 124.1(9)  | O10 | N10 | O8  | 122.7(15) |
| C8  | C7  | C6  | 115.4(8)  | O10 | N10 | O9  | 121.4(16) |
| C4  | C3  | C2  | 122.1(10) | O8  | N10 | Lu2 | 59.2(6)   |
| C51 | C52 | Br8 | 117.8(11) | O8  | N10 | O9  | 115.9(11) |
| C51 | C52 | C47 | 122.4(11) | O9  | N10 | Lu2 | 56.7(6)   |
| C47 | C52 | Br8 | 119.8(11) | C21 | C22 | C23 | 119.7(11) |
| C25 | N3  | Lu1 | 121.9(6)  | N4  | C30 | C29 | 122.9(11) |
| C21 | N3  | Lu1 | 121.6(6)  | N8  | C53 | C54 | 122.5(11) |
| C21 | N3  | C25 | 116.5(8)  | C53 | C54 | C55 | 121.5(12) |
| C24 | C25 | C26 | 122.6(8)  | C28 | C29 | C30 | 120.5(11) |
| N3  | C25 | C24 | 122.0(9)  | C36 | C35 | C34 | 122.0(12) |
| N3  | C25 | C26 | 115.2(8)  | N3  | C21 | C22 | 124.0(10) |
| C57 | N8  | Lu2 | 122.2(7)  | C52 | C51 | C50 | 117.7(12) |
| C53 | N8  | Lu2 | 120.3(7)  | C45 | C46 | C47 | 119.1(13) |
| C53 | N8  | C57 | 117.3(9)  | N9  | C62 | C61 | 122.9(11) |
| N10 | O8  | Lu2 | 94.7(8)   | C60 | C61 | C62 | 122.1(13) |
| C27 | C26 | C25 | 122.4(9)  | C55 | C56 | C57 | 120.2(10) |
| N4  | C26 | C27 | 120.9(9)  | C20 | C19 | C18 | 118.9(12) |
| N4  | C26 | C25 | 116.7(8)  | C52 | C47 | C48 | 117.6(12) |
| C10 | C5  | C6  | 117.9(10) | C52 | C47 | C46 | 125.0(12) |
| C10 | C5  | C4  | 125.8(9)  | C46 | C47 | C48 | 117.3(13) |

---

|    |    |     |           |     |     |     |           |
|----|----|-----|-----------|-----|-----|-----|-----------|
| C4 | C5 | C6  | 116.4(10) | C46 | C45 | C44 | 122.1(14) |
| O5 | N5 | Lu1 | 176.4(8)  | C13 | C14 | C15 | 121.6(13) |

**Table S13.** Crystal data and structure refinement details for **MeOMBrQ-Ho**.

|                                             |                                                                                 |
|---------------------------------------------|---------------------------------------------------------------------------------|
| Empirical formula                           | C <sub>32</sub> H <sub>24</sub> Br <sub>4</sub> HoN <sub>5</sub> O <sub>7</sub> |
| Formula weight                              | 1075.09                                                                         |
| Temperature/K                               | 293(2)                                                                          |
| Crystal system                              | monoclinic                                                                      |
| Space group                                 | P2 <sub>1</sub> /c                                                              |
| a/Å                                         | 13.5152(7)                                                                      |
| b/Å                                         | 17.1668(8)                                                                      |
| c/Å                                         | 16.0298(8)                                                                      |
| α/°                                         | 90                                                                              |
| β/°                                         | 105.757(2)                                                                      |
| γ/°                                         | 90                                                                              |
| Volume/Å <sup>3</sup>                       | 3579.4(3)                                                                       |
| Z                                           | 4                                                                               |
| ρ <sub>calc</sub> /mg/mm <sup>3</sup>       | 1.995                                                                           |
| m/mm <sup>-1</sup>                          | 6.728                                                                           |
| F(000)                                      | 2056.0                                                                          |
| Crystal size/mm <sup>3</sup>                | 0.42 × 0.089 × 0.031                                                            |
| 2θ range for data collection                | 5.282 to 52.744°                                                                |
| Index ranges                                | -16 ≤ h ≤ 16, -21 ≤ k ≤ 21, -17 ≤ l ≤ 17                                        |
| Reflections collected                       | 49472                                                                           |
| Independent reflections                     | 6823[R(int) = 0.0959]                                                           |
| Data/restraints/parameters                  | 6823/1344/446                                                                   |
| Goodness-of-fit on F <sup>2</sup>           | 1.150                                                                           |
| Final R indexes [I ≥ 2σ (I)]                | R <sub>1</sub> = 0.0809, wR <sub>2</sub> = 0.2148                               |
| Final R indexes [all data]                  | R <sub>1</sub> = 0.1234, wR <sub>2</sub> = 0.2324                               |
| Largest diff. peak/hole / e Å <sup>-3</sup> | 3.04/-1.54                                                                      |

**Table S14.** Selected bond lengths (Å) for **MeOMBrQ-Ho**.

| Atom | Atom | Length/Å  | Atom | Atom | Length/Å  |
|------|------|-----------|------|------|-----------|
| Ho1  | O2   | 2.726(13) | C1   | C2   | 1.37(2)   |
| Ho1  | O3   | 2.100(11) | C1   | C10  | 1.55(2)   |
| Ho1  | O6   | 2.032(11) | C2   | C3   | 1.485(16) |
| Ho1  | O7   | 2.270(11) | C3   | C4   | 1.41(2)   |
| Ho1  | N1   | 2.745(15) | C4   | C5   | 1.38(2)   |
| Ho1  | N2   | 2.522(15) | C5   | C6   | 1.48(2)   |
| Ho1  | N3   | 2.750(15) | C5   | C10  | 1.492(16) |

|     |     |           |     |     |           |
|-----|-----|-----------|-----|-----|-----------|
| Ho1 | N5  | 2.751(15) | C6  | C7  | 1.33(2)   |
| Br1 | C18 | 1.868(18) | C7  | C8  | 1.489(16) |
| Br2 | C16 | 2.073(19) | C8  | C9  | 1.49(2)   |
| Br3 | C4  | 2.219(19) | C11 | C12 | 1.48(2)   |
| Br4 | C2  | 2.003(17) | C12 | C13 | 1.50(3)   |
| O1  | O2  | 1.839(16) | C13 | C14 | 1.39(2)   |
| O1  | N5  | 1.138(18) | C14 | C15 | 1.38(2)   |
| O2  | N5  | 1.171(17) | C15 | C16 | 1.47(2)   |
| O3  | N5  | 1.360(19) | C15 | C20 | 1.467(16) |
| O4  | C29 | 1.55(2)   | C16 | C17 | 1.27(2)   |
| O4  | C32 | 1.48(3)   | C17 | C18 | 1.53(3)   |
| O5  | C21 | 1.38(3)   | C18 | C19 | 1.42(2)   |
| O5  | C22 | 1.35(2)   | C19 | C20 | 1.42(2)   |
| O6  | C1  | 1.49(2)   | C22 | C23 | 1.47(3)   |
| O7  | C19 | 1.41(2)   | C22 | C25 | 1.50(3)   |
| N1  | C27 | 1.41(2)   | C23 | C24 | 1.38(3)   |
| N1  | C31 | 1.43(2)   | C25 | C26 | 1.38(2)   |
| N2  | C24 | 1.45(2)   | C26 | C27 | 1.493(16) |
| N2  | C26 | 1.49(2)   | C27 | C28 | 1.486(16) |
| N3  | C12 | 1.34(2)   | C28 | C29 | 1.49(3)   |
| N3  | C20 | 1.42(2)   | C29 | C30 | 1.43(3)   |
| N4  | C8  | 1.41(2)   | C30 | C31 | 1.56(3)   |
| N4  | C10 | 1.37(2)   |     |     |           |

**Table S15.** Selected bond angles (°) for **MeOMBrQ-Ho**.

| Atom | Atom | Atom | Angle/°  | Atom | Atom | Atom | Angle/°   |
|------|------|------|----------|------|------|------|-----------|
| O2   | Ho1  | N1   | 117.7(4) | C1   | C2   | C3   | 128.0(16) |
| O2   | Ho1  | N3   | 167.5(4) | C3   | C2   | Br4  | 130.3(12) |
| O2   | Ho1  | N5   | 24.7(4)  | C4   | C3   | C2   | 131.7(15) |
| O3   | Ho1  | O2   | 53.4(4)  | C3   | C4   | Br3  | 130.7(12) |
| O3   | Ho1  | O7   | 82.7(4)  | C5   | C4   | Br3  | 123.2(13) |
| O3   | Ho1  | N1   | 88.9(5)  | C5   | C4   | C3   | 106.1(16) |
| O3   | Ho1  | N2   | 102.0(5) | C4   | C5   | C6   | 111.4(15) |
| O3   | Ho1  | N3   | 134.3(4) | C4   | C5   | C10  | 122.3(16) |
| O3   | Ho1  | N5   | 28.8(4)  | C6   | C5   | C10  | 126.3(15) |
| O6   | Ho1  | O2   | 76.4(4)  | C7   | C6   | C5   | 103.6(16) |
| O6   | Ho1  | O3   | 127.5(5) | C6   | C7   | C8   | 128.0(17) |
| O6   | Ho1  | O7   | 128.7(4) | N4   | C8   | C7   | 131.0(15) |
| O6   | Ho1  | N1   | 132.1(4) | N4   | C8   | C9   | 103.4(14) |
| O6   | Ho1  | N2   | 77.5(5)  | C7   | C8   | C9   | 125.5(16) |
| O6   | Ho1  | N3   | 97.9(4)  | N4   | C10  | C1   | 98.9(13)  |

---

|     |     |     |           |     |     |     |           |
|-----|-----|-----|-----------|-----|-----|-----|-----------|
| O6  | Ho1 | N5  | 100.3(5)  | N4  | C10 | C5  | 128.9(15) |
| O7  | Ho1 | O2  | 129.8(4)  | C5  | C10 | C1  | 132.1(14) |
| O7  | Ho1 | N1  | 79.5(4)   | N3  | C12 | C11 | 112.8(16) |
| O7  | Ho1 | N2  | 142.8(5)  | N3  | C12 | C13 | 120.4(16) |
| O7  | Ho1 | N3  | 62.4(4)   | C11 | C12 | C13 | 126.8(15) |
| O7  | Ho1 | N5  | 108.7(4)  | C14 | C13 | C12 | 126.8(17) |
| N1  | Ho1 | N3  | 58.0(4)   | C15 | C14 | C13 | 112.9(17) |
| N1  | Ho1 | N5  | 105.2(4)  | C14 | C15 | C16 | 117.6(16) |
| N2  | Ho1 | O2  | 76.8(5)   | C14 | C15 | C20 | 119.4(16) |
| N2  | Ho1 | N1  | 63.9(5)   | C20 | C15 | C16 | 123.1(15) |
| N2  | Ho1 | N3  | 91.2(5)   | C15 | C16 | Br2 | 124.4(13) |
| N2  | Ho1 | N5  | 87.9(5)   | C17 | C16 | Br2 | 120.8(15) |
| N3  | Ho1 | N5  | 161.1(4)  | C17 | C16 | C15 | 114.8(17) |
| N5  | O1  | O2  | 37.8(9)   | C16 | C17 | C18 | 122.2(17) |
| O1  | O2  | Ho1 | 115.4(7)  | C17 | C18 | Br1 | 120.4(12) |
| N5  | O2  | Ho1 | 78.9(10)  | C19 | C18 | Br1 | 112.7(14) |
| N5  | O2  | O1  | 36.6(9)   | C19 | C18 | C17 | 126.9(16) |
| N5  | O3  | Ho1 | 103.3(8)  | O7  | C19 | C18 | 128.0(15) |
| C32 | O4  | C29 | 117.3(15) | O7  | C19 | C20 | 122.6(15) |
| C22 | O5  | C21 | 117.9(18) | C20 | C19 | C18 | 109.4(16) |
| C1  | O6  | Ho1 | 127.7(9)  | N3  | C20 | C15 | 127.8(15) |
| C19 | O7  | Ho1 | 128.6(9)  | C19 | C20 | N3  | 108.5(14) |
| C27 | N1  | Ho1 | 122.8(10) | C19 | C20 | C15 | 123.7(16) |
| C27 | N1  | C31 | 111.9(14) | O5  | C22 | C23 | 120.5(18) |
| C31 | N1  | Ho1 | 125.0(11) | O5  | C22 | C25 | 113.8(17) |
| C24 | N2  | Ho1 | 115.5(12) | C23 | C22 | C25 | 125.7(17) |
| C24 | N2  | C26 | 124.5(14) | C24 | C23 | C22 | 112.7(19) |
| C26 | N2  | Ho1 | 119.6(10) | C23 | C24 | N2  | 122.9(19) |
| C12 | N3  | Ho1 | 129.5(12) | C26 | C25 | C22 | 120.0(18) |
| C12 | N3  | C20 | 112.5(15) | N2  | C26 | C27 | 124.1(15) |
| C20 | N3  | Ho1 | 117.9(10) | C25 | C26 | N2  | 114.3(15) |
| C10 | N4  | C8  | 102.2(14) | C25 | C26 | C27 | 121.5(17) |
| O1  | N5  | Ho1 | 176.9(13) | N1  | C27 | C26 | 108.9(14) |
| O1  | N5  | O2  | 105.6(16) | N1  | C27 | C28 | 120.6(14) |
| O1  | N5  | O3  | 130.0(14) | C28 | C27 | C26 | 130.6(16) |
| O2  | N5  | Ho1 | 76.5(10)  | C27 | C28 | C29 | 130.1(16) |
| O2  | N5  | O3  | 124.4(14) | C28 | C29 | O4  | 134.0(16) |
| O3  | N5  | Ho1 | 48.0(7)   | C30 | C29 | O4  | 117.2(16) |
| O6  | C1  | C10 | 131.4(13) | C30 | C29 | C28 | 108.8(17) |
| C2  | C1  | O6  | 128.8(15) | C29 | C30 | C31 | 120.3(17) |
| C2  | C1  | C10 | 99.7(15)  | N1  | C31 | C30 | 128.3(16) |
| C1  | C2  | Br4 | 101.7(12) |     |     |     |           |

---





**Table S16.** Inhibitory rates (%) of **MeMBrQ-Lu**, **MeOMBrQ-Ho**, **MeMBrQ-Ho**, **MeBrQ-La**, **MeBrQ-Sm**,  $\text{Ho}(\text{NO}_3)_3 \cdot 6\text{H}_2\text{O}$ ,  $\text{Lu}(\text{NO}_3)_3 \cdot 6\text{H}_2\text{O}$ ,  $\text{La}(\text{NO}_3)_3 \cdot 6\text{H}_2\text{O}$ ,  $\text{Sm}(\text{NO}_3)_3 \cdot 6\text{H}_2\text{O}$ , MBrQ-H, BrQ-H, cisplatin, 4,4'-dimethyl-2,2'-bipyridyl (Me), 4,4'-dimethoxy-2,2'-bipyridine (MeO) against SK-OV-3/DDP, NCI-H460 and HeLa cancer cells for 48 h.

| Compounds                            | SK-OV-3/DDP  | NCI-H460     | HeLa         | HL-7702      |
|--------------------------------------|--------------|--------------|--------------|--------------|
| MBrQ-H                               | 25.16 ± 0.19 | 38.19 ± 1.15 | 28.06 ± 0.47 | 30.11 ± 1.18 |
| 4,4'-dimethyl-2,2'-bipyridyl (Me)    | 19.15 ± 0.63 | 25.58 ± 1.87 | 20.51 ± 0.37 | 30.15 ± 2.01 |
| 4,4'-dimethoxy-2,2'-bipyridine (MeO) | 25.84 ± 0.75 | 30.85 ± 0.28 | 21.33 ± 0.79 | 28.19 ± 1.06 |
| <b>MeMBrQ-Lu</b>                     | 73.26 ± 0.32 | 87.02 ± 0.97 | 90.51 ± 0.29 | 40.49 ± 2.06 |
| <b>MeOMBrQ-Ho</b>                    | 85.01 ± 1.31 | 93.54 ± 0.20 | 95.63 ± 0.36 | 45.21 ± 0.93 |
| <b>MeMBrQ-Ho</b>                     | 79.02 ± 0.41 | 91.19 ± 0.15 | 91.12 ± 1.06 | 42.87 ± 1.88 |
| BrQ-H                                | 35.29 ± 0.77 | 51.74 ± 1.09 | 40.88 ± 0.35 | 39.98 ± 1.53 |
| <b>MeBrQ-La</b>                      | 69.33 ± 1.22 | 82.17 ± 0.62 | 88.71 ± 1.62 | 38.66 ± 0.69 |

|                                                      |              |              |              |              |
|------------------------------------------------------|--------------|--------------|--------------|--------------|
| <b>MeBrQ-Sm</b>                                      | 62.11 ± 0.37 | 75.11 ± 1.64 | 80.23 ± 1.79 | 41.28 ± 1.45 |
| Ho(NO <sub>3</sub> ) <sub>3</sub> ·6H <sub>2</sub> O | 18.25 ± 0.96 | 21.09 ± 1.84 | 15.28 ± 2.01 | 28.55 ± 1.06 |
| Lu(NO <sub>3</sub> ) <sub>3</sub> ·6H <sub>2</sub> O | 20.77 ± 1.25 | 16.54 ± 2.15 | 20.11 ± 1.14 | 20.89 ± 1.47 |
| La(NO <sub>3</sub> ) <sub>3</sub> ·6H <sub>2</sub> O | 21.33 ± 0.36 | 18.46 ± 0.46 | 16.96 ± 0.42 | 24.33 ± 1.09 |
| Sm(NO <sub>3</sub> ) <sub>3</sub> ·6H <sub>2</sub> O | 15.26 ± 0.85 | 20.17 ± 0.98 | 20.41 ± 0.55 | 25.64 ± 0.64 |
| cisplatin                                            | 40.25 ± 2.02 | 65.23 ± 0.41 | 69.54 ± 0.94 | 64.58 ± 1.11 |

**Table S17.** Cellular distribution of **MeOMBrQ-Ho** (5.0 nM), cisplatin (12.6 μM) and **MeMBrQ-Ho** (125.0 nM) in HeLa cells after 24 h of incubation.

|                   | total                                         | nuclear fraction                             | mitochondrial fraction                       |
|-------------------|-----------------------------------------------|----------------------------------------------|----------------------------------------------|
| <b>MeOMBrQ-Ho</b> | (12.32±0.11 nmol of Pt)/10 <sup>6</sup> cells | (3.84±0.05 nmol of Ho)/10 <sup>6</sup> cells | (6.01±0.09 nmol of Ho)/10 <sup>6</sup> cells |
| <b>MeMBrQ-Ho</b>  | (7.51±0.09 nmol of Ho)/10 <sup>6</sup> cells  | (2.35±0.19 nmol of Ho)/10 <sup>6</sup> cells | (4.10±0.05 nmol of Ho)/10 <sup>6</sup> cells |
| cisplatin         | (4.85±0.05 nmol of Pt)/10 <sup>6</sup> cells  | (0.99±0.10 nmol of Pt)/10 <sup>6</sup> cells | (2.68±0.07 nmol of Pt)/10 <sup>6</sup> cells |

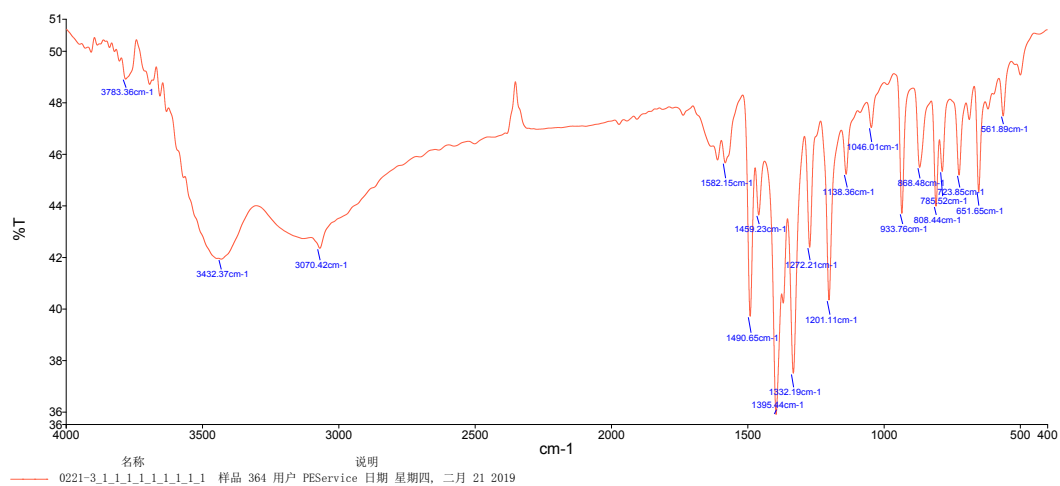

**Figure S1.** IR (KBr) spectra of MeBrQ-Sm.

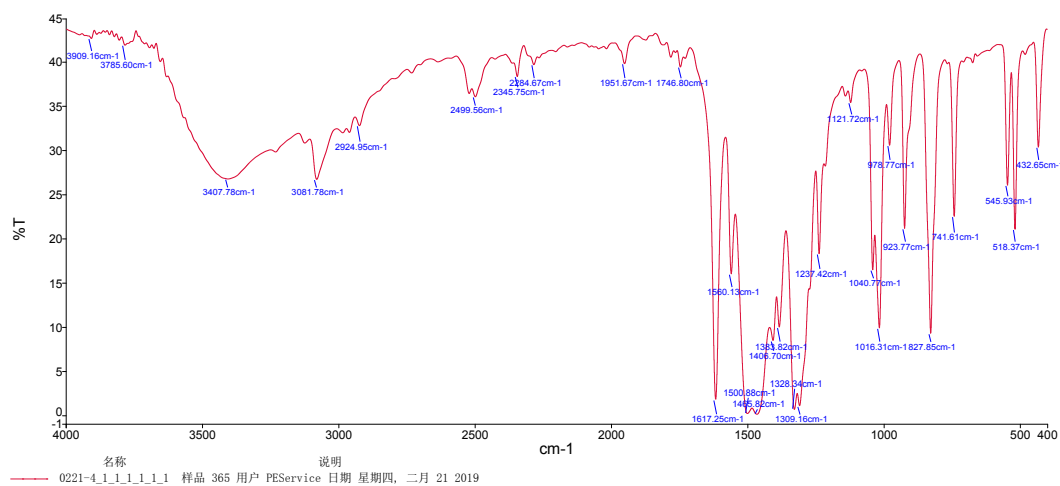

**Figure S2.** IR (KBr) spectra of MeMBRQ-Ho.

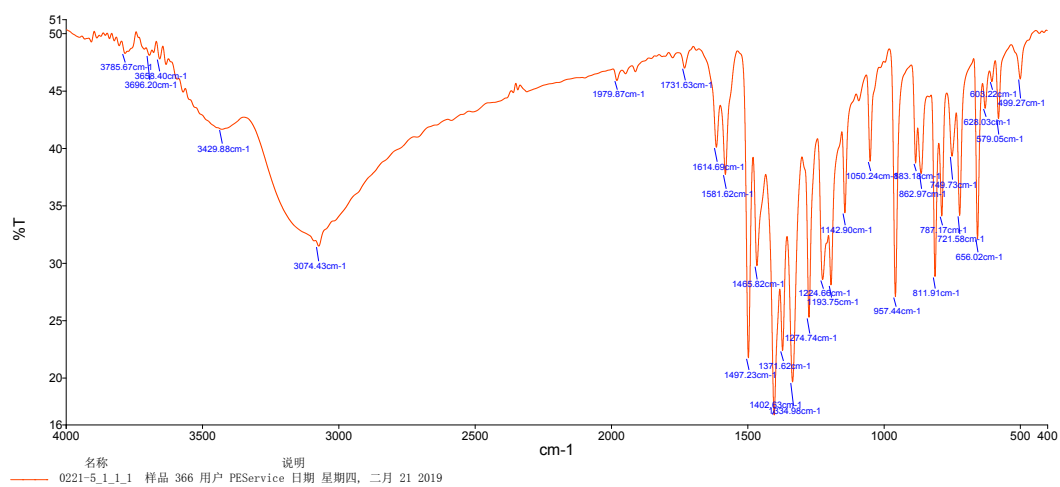

**Figure S3.** IR (KBr) spectra of MeBrQ-La.

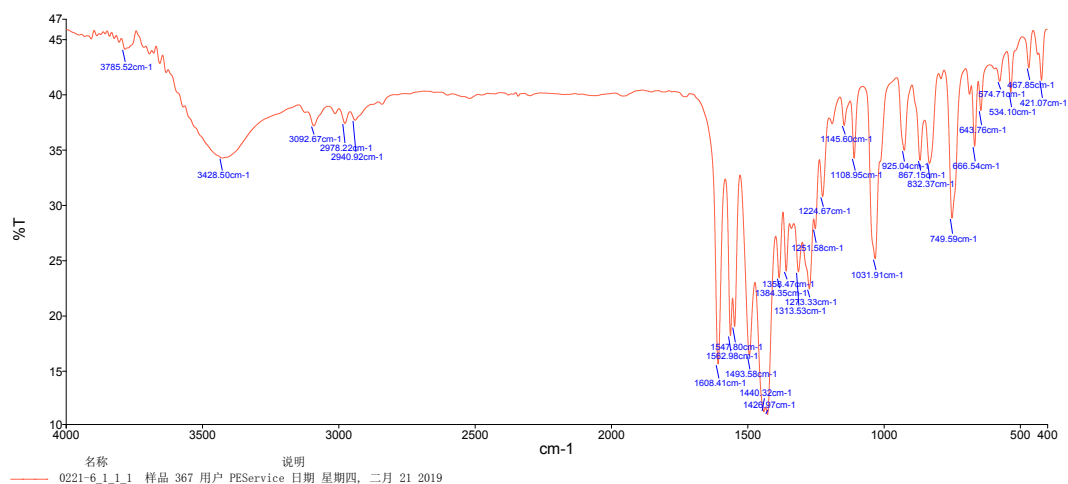

**Figure S4.** IR (KBr) spectra of MeOMBrQ-Ho.

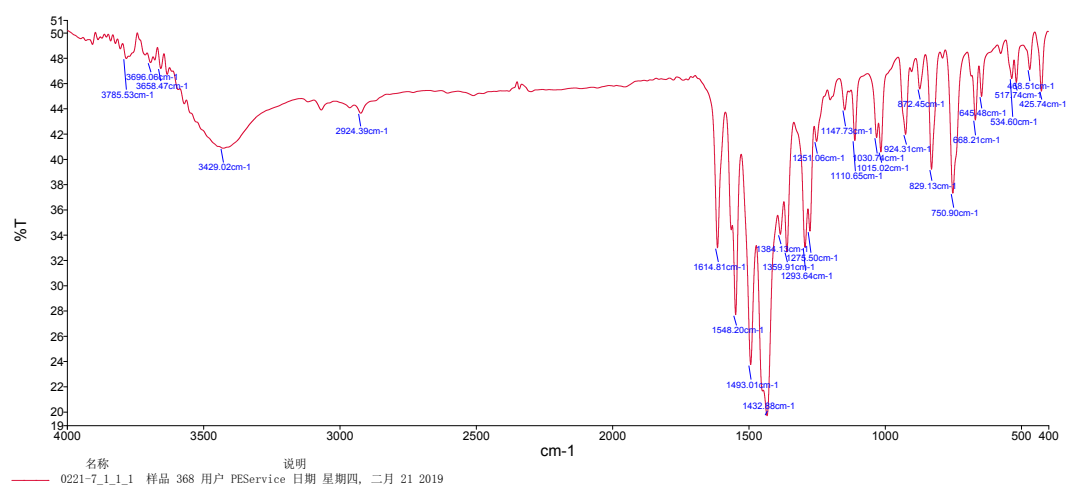

**Figure S5.** IR (KBr) spectra of MeMBrQ-Lu.

**Table S18.** ROS generation assay (OD value) in HeLa cells after treatment with MeMBrQ-Ho and MeOMBrQ-Ho for 24 h, respectively.

|                   | OD1           | OD2           | OD3           | mean value<br>of OD | SD           |
|-------------------|---------------|---------------|---------------|---------------------|--------------|
| Control           | 22.642        | 25.884        | 27.348        | 25.291              | 2.408        |
| <b>MeOMBrQ-Ho</b> | <b>40.567</b> | <b>42.325</b> | <b>44.936</b> | <b>42.609</b>       | <b>2.198</b> |
| <b>MeMBrQ-Ho</b>  | <b>43.278</b> | <b>41.455</b> | <b>39.121</b> | <b>41.285</b>       | <b>2.084</b> |

**Table S19.** The tumor volume in treated and non-treated mice from the date of surgery to the study end point in the Hela xenograft model.

| Group                         | Tumor Volume (mm <sup>3</sup> ) |              | T/C               |
|-------------------------------|---------------------------------|--------------|-------------------|
|                               | (start)                         | (end)        | (%)               |
| Control                       | 82.4±27.0                       | 1127.8±180.7 | -                 |
| <b>MeOMBrQ-Ho</b> (5.0 mg/kg) | 82.0±26.5                       | 490.0±150.9  | 42.9 <sup>a</sup> |

a mean  $p < 0.05$ ,  $p$  vs vehicle control

**Table S20.** Average body weight in treated and non-treated mice from the date of surgery to the study end point in the Hela xenograft model.

| Group                         | Body Weight (g) |          | RBW (%) |
|-------------------------------|-----------------|----------|---------|
|                               | (start)         | (end)    | (end)   |
| Control                       | 18.7±1.2        | 20.7±1.4 | 110.7   |
| <b>MeOMBrQ-Ho</b> (5.0 mg/kg) | 18.5±0.8        | 20.1±0.6 | 108.6   |

**Table S21.** In Vivo Anticancer Activity of **MeOMBrQ-Ho** (5.0 mg/kg) toward Hela Tumor Xenograft.

| Group                         | average tumor       | inhibition of tumor |
|-------------------------------|---------------------|---------------------|
|                               | weight(mean ± SD g) | growth(%)           |
| Control                       | 1.562±0.148         | -                   |
| <b>MeOMBrQ-Ho</b> (5.0 mg/kg) | 0.769±0.096         | 50.8                |

<sup>a</sup> mean  $p < 0.05$ ,  $p$  vs control.

## Experimental methods

### *MTT assay for cell viability*

The cells were incubated in the presence of different concentrations of **MeMBrQ-Lu**, **MeOMBrQ-Ho**, **MeMBrQ-Ho**, **MeBrQ-La**, **MeBrQ-Sm**,  $\text{Ho}(\text{NO}_3)_3 \cdot 6\text{H}_2\text{O}$ ,  $\text{Lu}(\text{NO}_3)_3 \cdot 6\text{H}_2\text{O}$ ,  $\text{La}(\text{NO}_3)_3 \cdot 6\text{H}_2\text{O}$ ,  $\text{Sm}(\text{NO}_3)_3 \cdot 6\text{H}_2\text{O}$ , MBrQ-H, BrQ-H, cisplatin, 4,4'-dimethyl-2,2'-bipyridyl (Me), 4,4'-dimethoxy-2,2'-bipyridine (MeO) for 48 h, before they were then reacted with MTT (2.0 mg/mL) (3-[4,5-dimethylthiazol-2-yl]-2,5-diphenyl tetrazolium bromide) at 37 °C for 4 h. The reaction product, formazan, was extracted with dimethyl sulphoxide (DMSO) and the absorbance was read at 540 nm as previously described. The assays were performed in triplicate, and results are expressed as the percent reduction in cell viability compared to untreated control cultures for at least five independent experiments.  $\text{IC}_{50}$  values refer to the concentration needed to inhibit 50% of cell viability in the presence of the **MeMBrQ-Lu**, **MeOMBrQ-Ho**, **MeMBrQ-Ho**, **MeBrQ-La**, **MeBrQ-Sm**,  $\text{Ho}(\text{NO}_3)_3 \cdot 6\text{H}_2\text{O}$ ,  $\text{Lu}(\text{NO}_3)_3 \cdot 6\text{H}_2\text{O}$ ,  $\text{La}(\text{NO}_3)_3 \cdot 6\text{H}_2\text{O}$ ,  $\text{Sm}(\text{NO}_3)_3 \cdot 6\text{H}_2\text{O}$ , MBrQ-H, BrQ-H, cisplatin, 4,4'-dimethyl-2,2'-bipyridyl (Me), 4,4'-dimethoxy-2,2'-bipyridine (MeO).

**Cellular uptake of MeOMBrQ-Ho and MeMBrQ-Ho in HeLa cancer cells.** The HeLa cancer cells (~10 million cells) were treated with **MeOMBrQ-Ho** (1.0 nM), cisplatin (12.62  $\mu\text{M}$ ) and **MeMBrQ-Ho** (125.0 nM) for 24 h at 37 °C in a humidified 5%  $\text{CO}_2$  incubator. The spent media was removed, and the cells were washed with 5 mL of PBS, scraped, and collected in 5 mL of PBS. The scrapped cells were spun down, by centrifuging at 2500 rpm for 10 min. The cell pellet obtained was dissolved in 1 M NaOH (1 mL) and diluted with 2% (v/v)  $\text{HNO}_3$  (5 mL) for determining whole

cell Pt or Ho content. Another set was treated similarly, nuclear fraction, and mitochondria fraction were isolated as described by Schreiber and Liang et al <sup>1,2</sup>, and the final solution was made up to 5 mL using 2% (v/v) HNO<sub>3</sub>. The amount of Pt or Ho taken up by the cells was determined by ICP-MS. The instrument was calibrated for Pt complexes using standard solutions containing 10, 50, 100, 500 and 1000 ppb Pt or Ho metal.

### ***TRAP-silver staining assay***

Telomerase extract was prepared from HeLa cells. A modified version of the TRAP assay was used. PCR was performed in a final 50 µL reaction volume composed of reaction mix (45 µL) containing Tris-HCl (20 mM, pH 8.0), deoxynucleotide triphosphates (50 mM), MgCl<sub>2</sub> (1.5 mM), KCl (63 mM), EGTA (1 mM), Tween-20 (0.005%), BSA (20.0 µg/mL), primer HTG21 (3.5 pmol; 5'-G<sub>3</sub>ACHTUNG[TRENUNG][T<sub>2</sub>AG<sub>3</sub>]<sub>3</sub>-3'), primer TS (18 pmol; 5'-AATCCGTCGAGCAGAGTT-3'), primer CXext (22.5 pmol; 5'-GTGCCCTTACCCTTACCCTTACCCTAA-3'), primer NT (7.5 pmol; 5'-ATCGCTTCTCGGCCTTTT-3'), TSNT internal control (0.01 amol; 5'-ATTCCGTCGAGCAGAGTTAAAAGGCCGAGAAGCGAT-3'), Taq DNA polymerase (2.5 U), and telomerase (100 ng). **MeOMBrQ-Ho** (1.0 nM) and **MeMBrQ-Ho** (125.0 nM) or distilled water were added (5 µL). PCR was performed in an Eppendorf Master cycler equipped with a hot lid and incubated for 30 min at 30 °C, followed by 92 °C 30 s, 52 °C 30 s, and 72 °C 30 s for 30 cycles. After amplification, loading buffer (8 µL; 5×TBE buffer, 0.2% bromophenol blue, and 0.2% xylene cyanol) was added to the reaction. An aliquot (15.0 µL) was loaded onto a nondenaturing acrylamide gel (16%; 19:1) in 1×TBE buffer and resolved at 200.0 V for 1.0 h. The Gels were fixed and then stained with AgNO<sub>3</sub>.

### ***Flow Cytometric Analysis***

In cell cycle analysis, the HeLa cancer cells were maintained with 10% fetal calf serum in 5% CO<sub>2</sub> at 37°C. After treatment with **MeOMBrQ-Ho** (1.0 nM) and **MeMBrQ-Ho** (125.0 nM), the cells were harvested by trypsinization and rinsed with PBS. After centrifugation, the pellet (10<sup>5</sup>–10<sup>6</sup> cells) was suspended in 1.0 mL of PBS and then fixed by dropwise addition of 9 mL of precooled (4 °C) 70% ethanol under violent shaking. After treatment, cells were collected and fixed with ice-cold 70% ethanol at –20 °C overnight. Fixed cells were resuspended in 0.5 mL of PBS containing 50 µg/mL propidium iodide and 100 µg/mL RNase A. The cell cycle distribution was analyzed by FACS Calibur flow cytometer (BD) and calculated using ModFIT LT software (BD).

### ***Cell apoptosis analysis***

The cell apoptosis was detected by flow cytometric analysis of annexin V staining. Briefly, adherent HeLa cells were harvested and suspended in the annexin-binding buffer (5 × 10<sup>5</sup> cells/mL). Then cells were incubated with annexin V-FITC and PI for 1.5 h at room temperature in the dark and immediately analyzed by flow cytometry. The data are presented as biparametric dot plots showing PI red fluorescence vs annexin V-FITC green fluorescence.

### ***Immunofluorescence***

HeLa cells (10<sup>5</sup>–10<sup>6</sup> cells) were grown on polylysine-coated coverslips, rinsed in phosphate-buffered saline, fixed in cold methanol for 20 min, permeabilized for 10 min in 0.5% Triton X-100 on ice, and blocked in 5% BSA for 30 min at room temperature. The coverslips were incubated with rabbit monoclonal anti-H2A.X (Abcam) primary antibodies for 3.0 h at 25 °C. The coverslips were washed and incubated with fluorescein conjugated Alexa Fluor® 488 Goat Anti-Rabbit IgG (H+L)



(1:1000) secondary antibodies. Finally, the cells stained with 0.1 mg/mL DAPI. Fluorescence images were captured using LeicaTCS-SP5 confocal microscope, (Germany, magnification 400×).

#### ***Flow cytometry analysis of $\Delta\Psi_m$***

JC-1 Assay Kit was used to detect the changes of  $\Delta\Psi_m$ . HeLa cells ( $5 \times 10^5$  cells/mL) were inoculated in 6-well plate for 24 h and then treated with **MeOMBrQ-Ho** (1.0 nM) and **MeMBrQ-Ho** (125.0 nM) for 24 h. After incubation, the HeLa cells were washed and resuspended with PBS. For analysis, 0.5 mL PBS buffer solution (including 10  $\mu\text{g/mL}$  JC-1 staining) was added into the suspension in darkness for 30.0 min at 37 ° C. The green fluorescence percentage from JC-1 monomers was detected by flow cytometry, which demonstrated the decrease of  $\Delta\Psi_m$ .

#### ***Assessment of intracellular ROS levels in HeLa cells***

The ROS Assay Kit (Beyotime) with fluorescent probe 2,7-dichloro fluorescein diacetate (DCFH-DA) was used to detect the intracellular ROS levels. Firstly, HeLa cells were treated with DCFH-DA (1: 250) in cell culture medium and kept in dark place for 30 min at 37 ° C, and then the HeLa cells were washed with 1 mL PBS. Subsequently, the cells were treated with **MeOMBrQ-Ho** (1.0 nM) and **MeMBrQ-Ho** (125.0 nM) for 24 h, and immediately measured the cellular fluorescence using a fluorescence photometer (GC126N, China) with excitation and emission wavelengths of 488 and 525 nm, respectively.

#### ***In vitro transwell migration assay***

The inhibition of tumor cell migration was assessed by the Boyden chamber (Corning Falcon) migration assay in 24-well cell culture plate with 8.0  $\mu\text{m}$  pore. Briefly, HeLa cancer cells were collected, centrifuged, and re-suspended with serum-free medium. The top chambers were seeded with  $5 \times 10^5$  cells in 200  $\mu\text{L}$  of serum-free

1640 medium containing different dose of **MeOMBrQ-Ho** (1.0 nM) and **MeMBrQ-Ho** (125.0 nM). The bottom chambers were filled with 600  $\mu$ L of complete medium supplemented with different dose of **MeOMBrQ-Ho** (1.0 nM) and **MeMBrQ-Ho** (125.0 nM). After 24 h incubation, non-migrated cells were removed with cotton swabs, and migrated cells were fixed with cold 4% paraformaldehyde and stained with 0.2% crystal violet for 1 min. Then the chambers were washed using water, and the membrane was left to dry. Images were taken with an inverted microscope (Olympus) and cells from three random areas per filter were counted.

### **Anticancer Activity toward HeLa *in Vivo***

HeLa cells were harvested and injected subcutaneously into the right flank of nude mice with  $5 \times 10^6$  cells in 200  $\mu$ L of serum-free medium. When the xenograft tumor growth to the volume about 1000 mm<sup>3</sup>, the mice were killed and the tumor tissue were cut into about 1.5 mm<sup>3</sup> small pieces, and then transplanted into the right flank of female nude mice, When tumors reach a volume of 80-190 mm<sup>3</sup> on all mice, the mice were randomized into vehicle control and treatment groups (n=6/group), received the following treatments: (a) control, 5.0% v/v DMSO/saline vehicle, (b) **MeOMBrQ-Ho** at dose 5.0 mg/kg every two day (5.0% v/v DMSO/saline). The tumor volumes were determined every three days by measuring length (*l*) and width (*w*) and calculating volume, tumor volume and inhibition of tumor growth were calculated using formulas 1–3:<sup>3-6</sup>

$$\text{Tumor volume: } V = (w^2 \times l) / 2 \quad (1)$$

$$\text{The tumor relative increment rate: } T/C (\%) = T_{RTV} / C_{RTV} \times 100\% \quad (2)$$

$$\text{inhibition of tumor growth: } IR(\%) = (W_c - W_t) / W_c \times 100\% \quad (3)$$

Where *w* and *l* mean the shorter and the longer diameter of the tumor respectively;

$T_{RTV}$  and  $C_{RTV}$  was the RTV of treated group and control group respectively. (RTV: relative tumor volume,  $RTV = V_t / V_0$ );  $W_t$  and  $W_c$  mean the average tumor weight of complex-treated and vehicle controlled group respectively.

In addition, HeLa xenograft mouse models were purchased from Beijing HFK Bioscience Co., Ltd (Beijing, China, approval No. SCXK 2014-004). The animal procedures were approved by the Institute of Radiation Medicine Chinese Academy of Medical Sciences (Tian Jin, China, approval No. SYXK 2014-0002). And all of the experimental procedures were carried out in accordance with the NIH Guidelines for the Care and Use of Laboratory Animals. Animal experiments were approved by the Animal Care and Use Committee of Institute of Radiation Medicine Chinese Academy of Medical Sciences.

### **Statistical Analysis**

The experiments have been repeated from three to five times, and the results obtained are presented as means  $\pm$  standard deviation (SD). Significant changes were assessed by using Student's *t* test for unpaired data, and *p* values of  $<0.05$  were considered significant.

### **Abbreviations**

SD, standard deviation; TBS, Tris-HCl buffer; MTT, 3-(4,5-dimethylthiazol-2-yl)-2,5-diphenyltetrazolium bromide; TGI, tumor growth inhibition; PI, propidium iodide; MMP, mitochondrial membrane potential; JC-1, 5,5',6,6'-tetrachloro-1,1',3,3'-tetraethylbenzimidazolylcarbocyanine; IR, tumor growth inhibition rate.

## **■ REFERENCES**

- 1 E. Schreiber, P. Matthias, M. M. Mueller and W. Schaffner, Rapid detection of octamer binding proteins with 'mini-extracts', prepared from a small number of cells, *Nucleic Acids Res.*, 1989, **17**, 6419.
- 2 Z.-F. Chen, Q.-P. Qin, J.-L. Qin, Y.-C. Liu, K.-B. Huang, Y.-L. Li, T. Meng, G.-H. Zhang, Y. Peng, X.-J. Luo and H. Liang, Stabilization of G-quadruplex DNA, inhibition of telomerase activity, and tumor cell apoptosis by organoplatinum(II) complexes with oxoisoaporphine, *J. Med. Chem.*, 2015, **58**, 2159–2179.
- 3 J. Sun, M. Blaskovich, D. Knowles, Y. Qian, J. Ohkanda, R. Bailey, A. Hamilton and S. Sebti, Antitumor efficacy of a novel class of nonthiol-containing peptidomimetic inhibitors of farnesyltransferase and geranylgeranyltransferase I, *Cancer Res.*, 1999, **59**, 4919–4926.
- 4 Y. Wang, J. Xiao, H.-P. Zhou, S.-L. Yang, X.-P. Wu and G. Liang, A Novel monocarbonyl analogue of curcumin, (1E,4E)-1,5-bis(2,3-dimethoxyphenyl)penta-1,4-dien-3-one, induced cancer cell H460 apoptosis via activation of endoplasmic reticulum stress signaling pathway, *J. Med. Chem.*, 2011, **54**, 3768–3778.
- 5 D. Palanimuthu, S. V. Shinde, K. Somasundaram and A. G. Samuelson, *In vitro* and *in vivo* anticancer activity of copper bis(thiosemicarbazone) complexes, *J. Med. Chem.*, 2013, **56**, 722–734.
